# Supplementary material for: Repurposing CRISPR-Cas12b for mammalian genome engineering
Source: PubMed Central journal article supplement (PMC6255809; doi:10.1038/s41421-018-0069-3), 2018-11-27
Supplement: 41421_2018_69_MOESM1_ESM.pdf [file 41421_2018_69_MOESM1_ESM.pdf]

# Figure S1

**a**

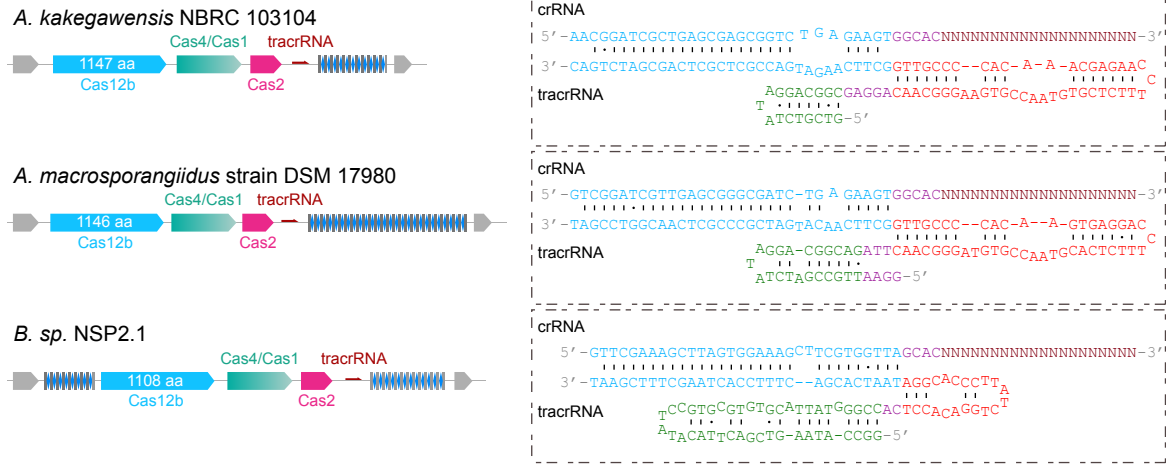

**b**

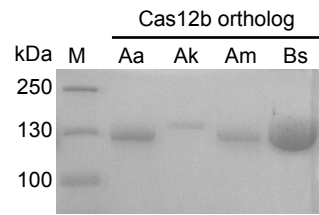

**c**

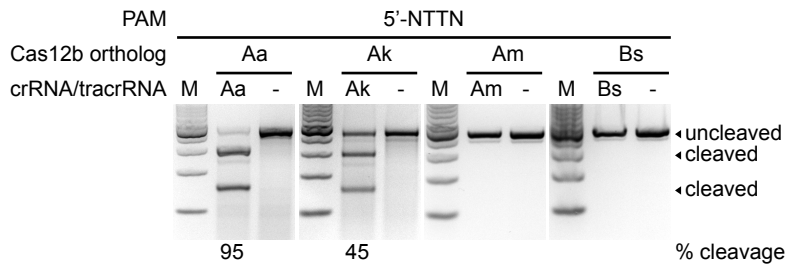

**d**

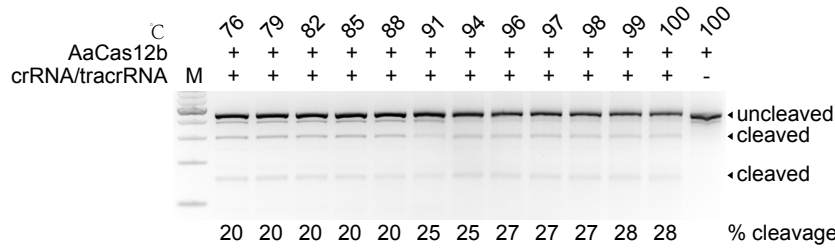

**e**

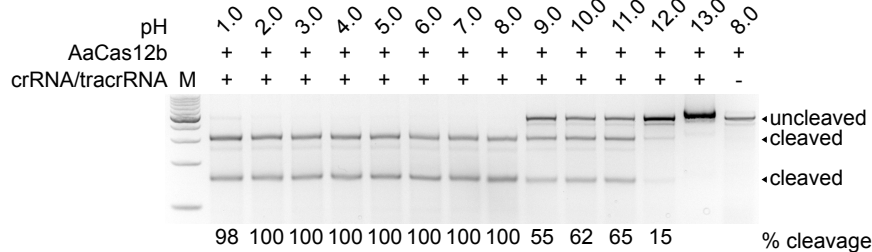

**f**

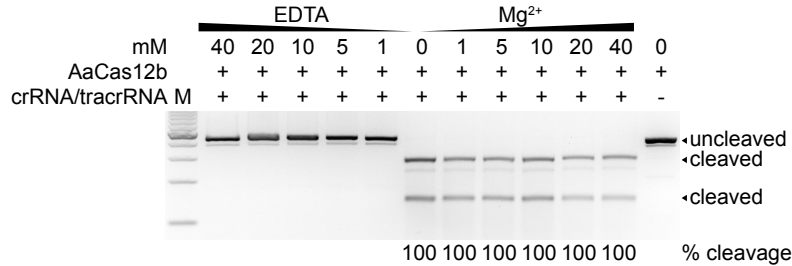

**g**

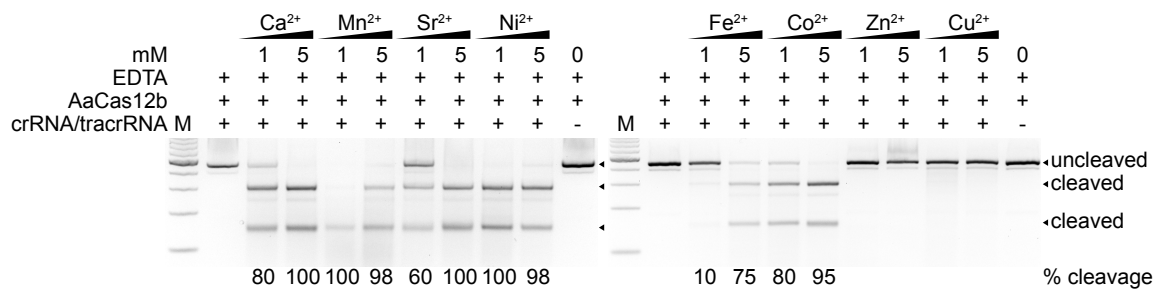



**Fig. S1. *In vitro* DNA cleavage assay of Cas12b proteins.** **a** Schematic illustration of the genomic architecture of CRISPR-Cas12b from *Alicyclobacillus kakegawensis* (NBRC 103104), *Alicyclobacillus macrosporangioides* (strain DSM 17980), *Bacillus sp. (NSP2.1)* (*left*), and the crRNA/tracrRNA duplex from each strain (*right*). **b** Coomassie blue staining of AaCas12b, AkCas12b, AmCas12b and BsCas12b purified from *E. coli*. **c** *In vitro* cleavage of double-stranded DNAs containing the 5'-NTTN PAMs by the purified AaCas12b, AkCas12b, AmCas12b and BsCas12b proteins and their cognate crRNA/tracrRNA duplexes. The cleavage rate is shown under the cleaved lanes. **d** *In vitro* cleavage activity of AaCas12b at various temperatures. The cleavage rate is shown under the cleaved lanes. **e** *In vitro* cleavage activity of AaCas12b under various pH conditions. The cleavage rate is shown under the cleaved lanes. **f** *In vitro* cleavage assay showing the Mg<sup>2+</sup>-dependent endonuclease activity of AaCas12b. The cleavage rate is shown under the cleaved lanes. **g** *In vitro* cleavage assay of AaCas12b in the presence of indicated metals, Ca<sup>2+</sup>, Mn<sup>2+</sup>, Sr<sup>2+</sup>, Ni<sup>2+</sup>, Fe<sup>2+</sup>, Co<sup>2+</sup>, Zn<sup>2+</sup>, Cu<sup>2+</sup>. The cleavage rate is shown under the cleaved lanes. **h** *In vitro* validation of the PAM requirements of AkCas12b showing that PAMs matching the 5'-TTTN sequence can be efficiently cleaved. The cleavage rate is shown under the cleaved lanes. **i** Cleavage site determination of AaCas12b by sequencing the cleavage products. The cleavage sites are indicated by red triangles in the left panel. TS, target strand; NTS, non-target strand.

# Figure S2

**a**

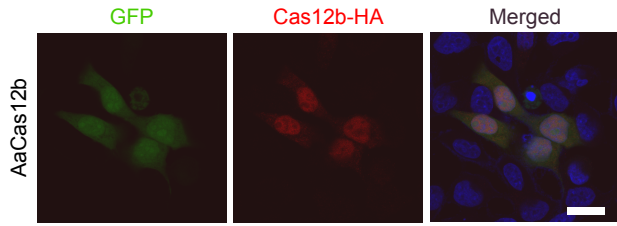

**b**

Human *RNF2* target 2

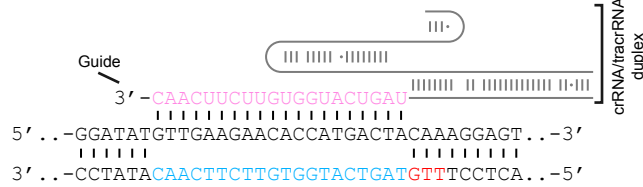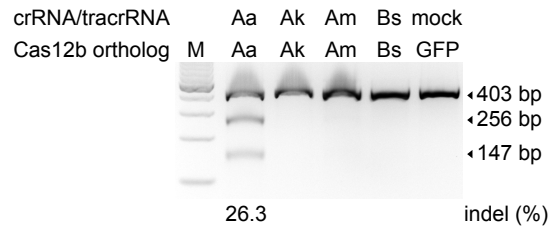

**c**

Mouse *Nrl* target 1

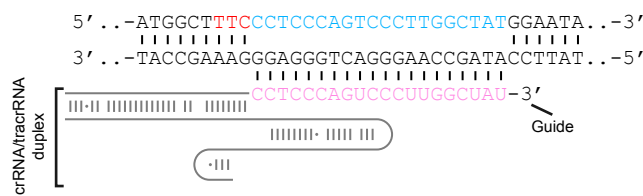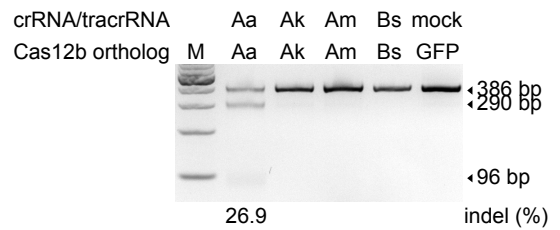

**d**

Human *RNF2* target 2

|                                                                          |           |
|--------------------------------------------------------------------------|-----------|
| TGAATTAATGTGCCCAATTTGTTTGGATATGTTGAAGAACACCCATGACTACAAAGGAGTGTTTACATCGTT | Wild-type |
| TGAATTAATGTGCCCAATTTGTTTGGATATGTTGAAGAACACCCATGACTACAAAGGAGTGTTTACATCGTT | Δ4        |
| TGAATTAATGTGCCCAATTTGTTTGGATA-----AAGAACACCCATGACTACAAAGGAGTGTTTACATCGTT | Δ5        |
| TGAATTAATGTGCCCAATTTGTTTGGATATGT-----AACACCCATGACTACAAAGGAGTGTTTACATCGTT | Δ5        |
| TGAATTAATGTGCCCAATTTGTTT-----TGAAGAACACCCATGACTACAAAGGAGTGTTTACATCGTT    | Δ8        |
| TGAATTAATGTGCCCAATTTGTTTGGATA-----AACACCCATGACTACAAAGGAGTGTTTACATCGTT    | Δ8        |
| TGAATTAATGTGCCCAATTTGTTTGGATA-----TGTTTACATCGTT                          | Δ29       |

**e**

Mouse *Nrl* target 1

|                                                                         |           |
|-------------------------------------------------------------------------|-----------|
| CTCAGTCCCAGAATGGCTTCCCTCCCAGTCCCTTG-GCTATGGAATATGTTAATGACTTTGATTTGATGA  | Wild-type |
| CTCAGTCCCAGAATGGCTTCCCTCCCAGTCCCTTGcGCTATGGAATATGTTAATGACTTTGATTTGATGA  | +1        |
| CTCAGTCCCAGAATGGCTTCCCTCCCAGTCCCTTG-GC--TGGAAATATGTTAATGACTTTGATTTGATGA | Δ2        |
| CTCAGTCCCAGAATGGCTTCCCTCCCAGTCCCTTG-----GAATATGTTAATGACTTTGATTTGATGA    | Δ6        |
| CTCAGTCCCAGAATGGCTTCCCTCCCAGTCCCTT-----TGTTAATGACTTTGATTTGATGA          | Δ12       |
| CTCAGTCCCAGAATGGCTTCCCTCCCAGTCCCTT-----GTTAATGACTTTGATTTGATGA           | Δ13       |
| CTCAGTCCCAGAATGGCTTCCCTCCCAGTCCCTT-----TGATGA                           | Δ29       |

**Fig. S2 Cas12b nucleases mediate robust genome editing in mammalian cells. a** Immunofluorescence staining showing two nuclear localization signals (NLSs) ensured nuclear compartmentalization of AaCas12b in HeLa cells. Scale bar, 20  $\mu$ m. **b (Left)** Schematic illustration of the human *RNF2* target site 2 of AaCas12b and crRNA/tracrRNA duplex. Red letters indicate the PAM sequence. **(Right)** T7EI analysis of indels produced by Cas12b orthologues (AaCas12b, AkCas12b, AmCas12b and BsCas12b) at the human *RNF2* gene target site 2. The indel rate is shown under the lane with mutation. mock, an U6 empty vector without crRNA/tracrRNA expression. GFP, an empty backbone vector without Cas12b protein expression. **c (Left)** Schematic illustration of the mouse *Nrl* target site 1 of AaCas12b and crRNA/tracrRNA duplex. Red letters indicate the PAM sequences. **(Right)** T7EI analysis of indels produced by Cas12b orthologues (AaCas12b, AkCas12b, AmCas12b and BsCas12b) at the mouse *Nrl* gene target site 1. The indel rate is shown under the lane with mutation. mock, an U6 empty vector without crRNA/tracrRNA expression. GFP, an empty backbone vector without Cas12b protein expression. **d** Sanger sequencing results showing the indels in human *RNF2* target site 2 produced by AaCas12b. Blue dashes, deleted bases; red uppercases, PAM. **e** Sanger sequencing results showing the indels in mouse *Nrl* target site 1 produced by AaCas12b. Blue dashes, deleted bases; purple lowercases, insertions or mutations; red uppercases, PAM.

**Figure S3**

| Gene          | Sequence (5' - 3')                                                                                                                                      | % indel frequency |            |            |
|---------------|---------------------------------------------------------------------------------------------------------------------------------------------------------|-------------------|------------|------------|
|               |                                                                                                                                                         | AaCas12b          | AsCas12a   | SpCas9     |
| <i>CCR5</i>   | GAA <u>TTCTTTGGCCTGAATAATGCAGTAGCTCTAACAGG</u> TTGGACCAA<br>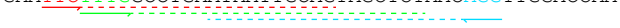           | 19.4 ± 0.5        | 21.1 ± 1.0 | 18.8 ± 0.8 |
| <i>CCR5</i>   | TTCTCCTGAACA <u>CCTTCCAGGAATTCTTTGGCCTGAA</u> TAATTGCAGTA<br>          | 10.4 ± 0.9        | ND         | 35.1 ± 1.3 |
| <i>DNMT1</i>  | GACTTTTCCT <u>TTTATTTC</u> CCTTCAGCTAAAATA <u>AGG</u> AGGAGGAAGCT<br>  | 28.1 ± 2.8        | 20.1 ± 2.0 | 16.7 ± 1.1 |
| <i>DNMT1</i>  | CGTTAATG <u>TTTCCT</u> GATGGTCCATGCTGTACTCGCCTGTCAAGTGG<br>            | 13.0 ± 0.9        | 15.6 ± 0.8 | 21.5 ± 1.2 |
| <i>DYRK1A</i> | CATGAGGTGAC <u>CCATTTC</u> CATTCAAGGGTTTTAGAAGCACATCAAGGA<br>          | 22.0 ± 1.8        | ND         | 24.3 ± 1.5 |
| <i>EMX1</i>   | CGATGTCACCTCCAATGACTAGGG <u>TGGCA</u> CCACA <u>AA</u> CCACGAGGG<br>    | 5.2 ± 0.8         | 11.9 ± 1.1 | 20.1 ± 1.3 |
| <i>RNF2</i>   | CCCAATTGTTGGATATGTTGAAGAACACCATGACTACA <u>AAAGG</u> AGTG<br>           | 26.7 ± 0.4        | 12.7 ± 2.1 | 29.5 ± 3.0 |
| <i>Nrl</i>    | ATGGC <u>TTTC</u> CCTCCCAGTCCCTTGGCTA <u>TGGA</u> ATATGTTAATGACTTT<br> | 35.9 ± 0.7        | 20.9 ± 0.6 | 30.8 ± 1.2 |

ND, not detectable

**Fig. S3 Frequency of AaCas12b-, AsCas12a- and SpCas9-mediated targeted indel mutations at on-target sites in mammalian cells.** Target genomic DNA sequences and the resulted indel frequencies of AaCas12b, AsCas12a and SpCas9 are shown. Target sites for AaCas12b, AsCas12a and SpCas9 are shown and underlined in red, green and blue, respectively. Mutation frequencies were assessed by T7EI assay. Error bars indicate standard errors of the mean (s.e.m.), n = 2.

**Figure S4**

**a**

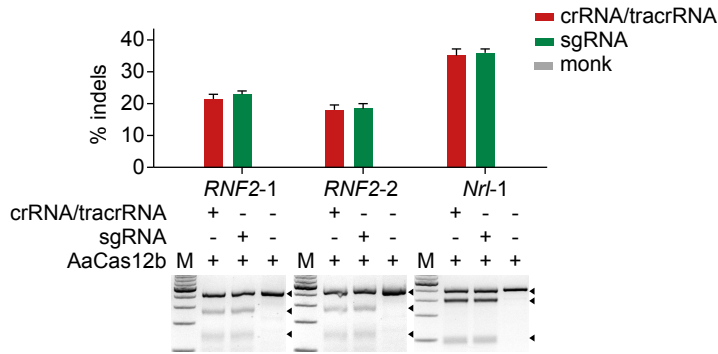

**b**

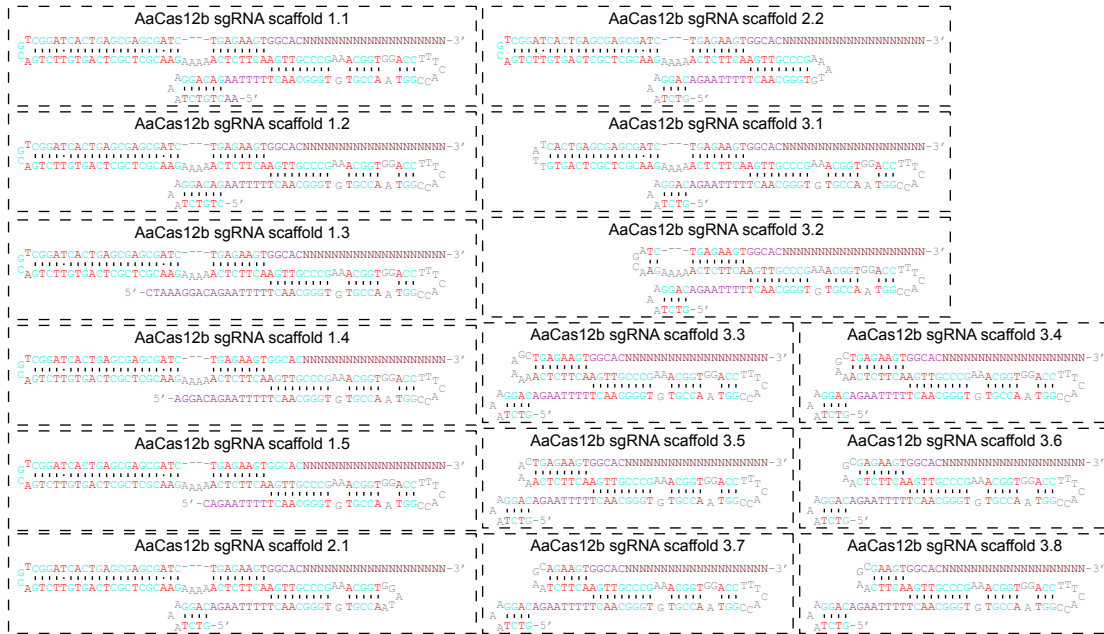

**c**

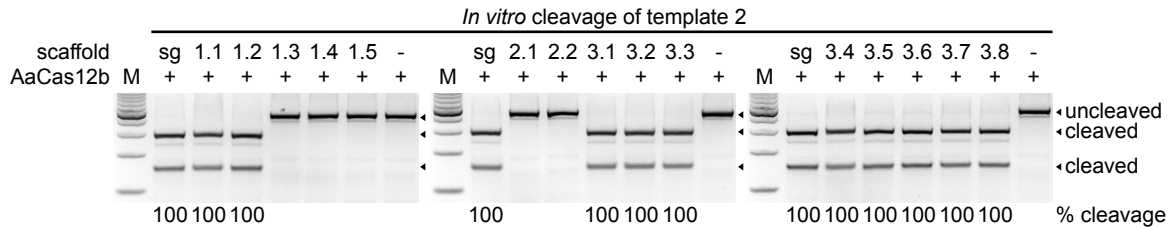

**d**

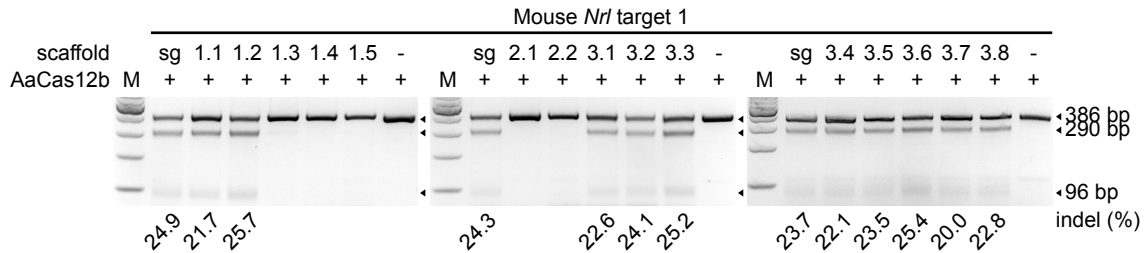



**Fig. S4 Engineered AaCas12b chimeric sgRNAs for genome editing.** **a** Indel frequencies induced by AaCas12b directed by crRNA/tracrRNA duplexes and sgRNAs. Indel frequencies are calculated by T7EI assay. Error bars indicate standard errors of the mean (s.e.m.), n = 3. **b** Schematic illustration of 5' truncated sgRNAs on stem loop 1, 2 and 3. **c** *In vitro* DNA cleavage assay of AaCas12b complexed with the optimized sgRNAs. The cleavage rate is shown under the cleaved lanes. **d** Targeting of mouse *Nrl* gene by AaCas12b complexed with the optimized sgRNAs. The indel rate is shown under the lanes with mutation.

# Figure S5

**a**

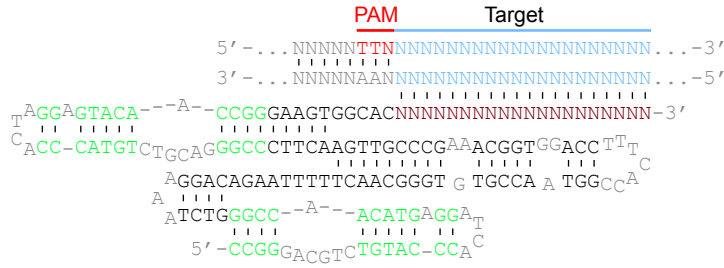

**b**

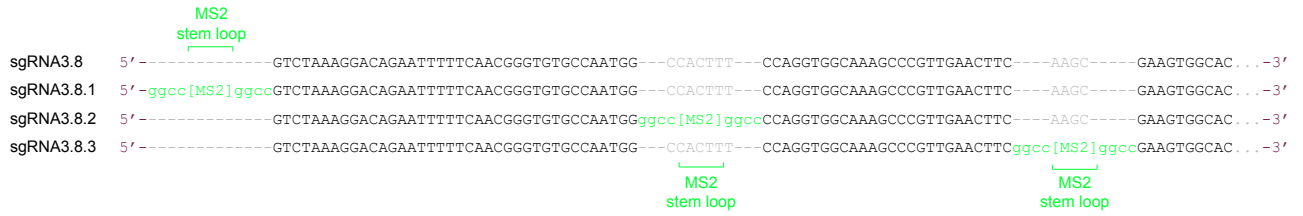

**c**

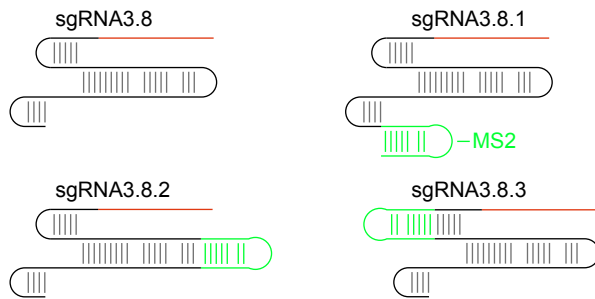

**d**

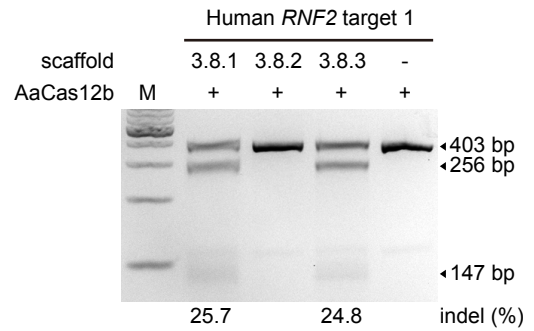

**Fig. S5 Engineer MS2 hairpin into sgRNA scaffold.** **a** Schematic illustration of the sgRNA3.8 scaffold constructed with the MS2 RNA hairpin. **b** Alignment of the sequences of sgRNA scaffolds engineered with MS2 RNA hairpin. **c** Schematic illustration of AaCas12b sgRNA scaffolds inserted with the MS2 RNA hairpin. **d** Insertion of the MS2 RNA hairpin into AaCas12b sgRNA stem loop 1 and 3, but not the stem loop 2, maintains the cleavage activity of AaCas12b in human cells. The indel rate is shown under the lanes with mutation.

# Figure S6

**a**

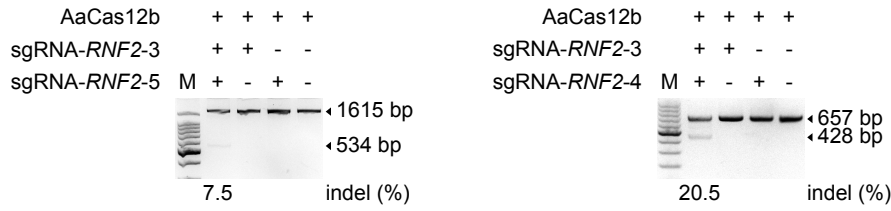

**b**

Human *RNF2* locus

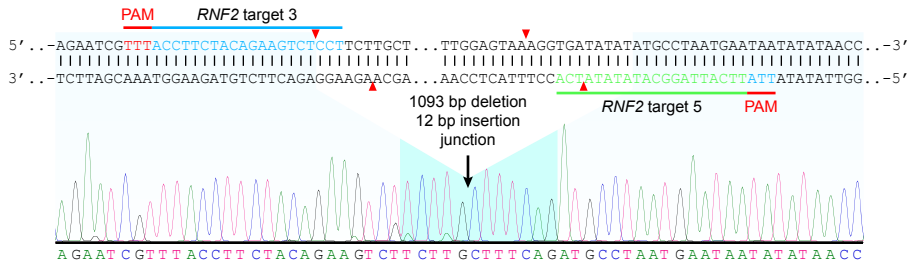

Human *RNF2* locus

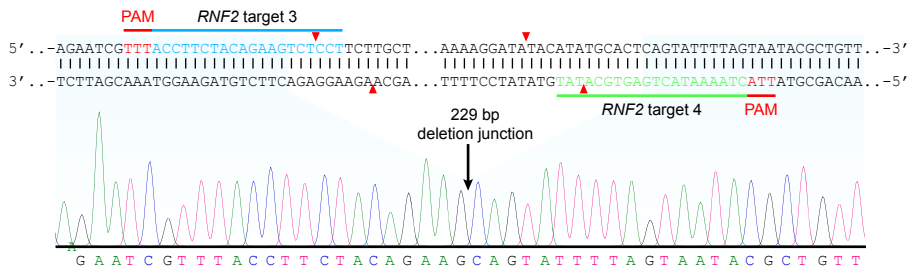

**c**

Mouse *Nrl* target 1

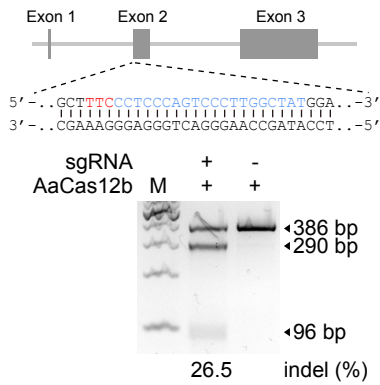

Mouse *Prmt7* target 1

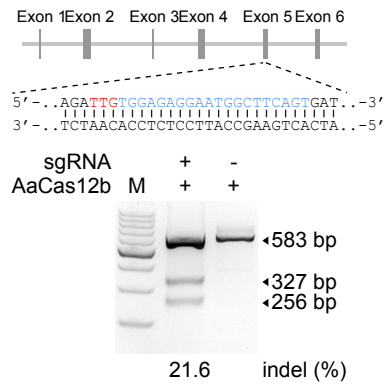

**Fig. S6 Multiplex genome editing using AaCas12b combined with sgRNA.** **a** AaCas12b-mediated large genomic deletions by simultaneously targeting human *RNF2* target sites 3 and 5 (~1093 bp deletion) (*left*), and human *RNF2* target sites 3 and 4 (~229 bp deletion) (*right*) in 293FT cells. The indel rate is shown under the lanes with mutation. **b** Sanger sequencing results showing the AaCas12b-mediated large genomic deletion by simultaneously targeting human *RNF2* target sites 3 and 5 (~1093 bp deletion) (*left*), and human *RNF2* target sites 3 and 4 (~229 bp deletion) (*right*) in 293FT cells in [Fig. S6a](#). **c** AaCas12b facilitated multiplex genome editing by simultaneously targeting the mouse *Nrl* and *Prmt7* genes using two sgRNAs in the mouse genome. The indel rate is shown under the lanes with mutation.

Figure S7

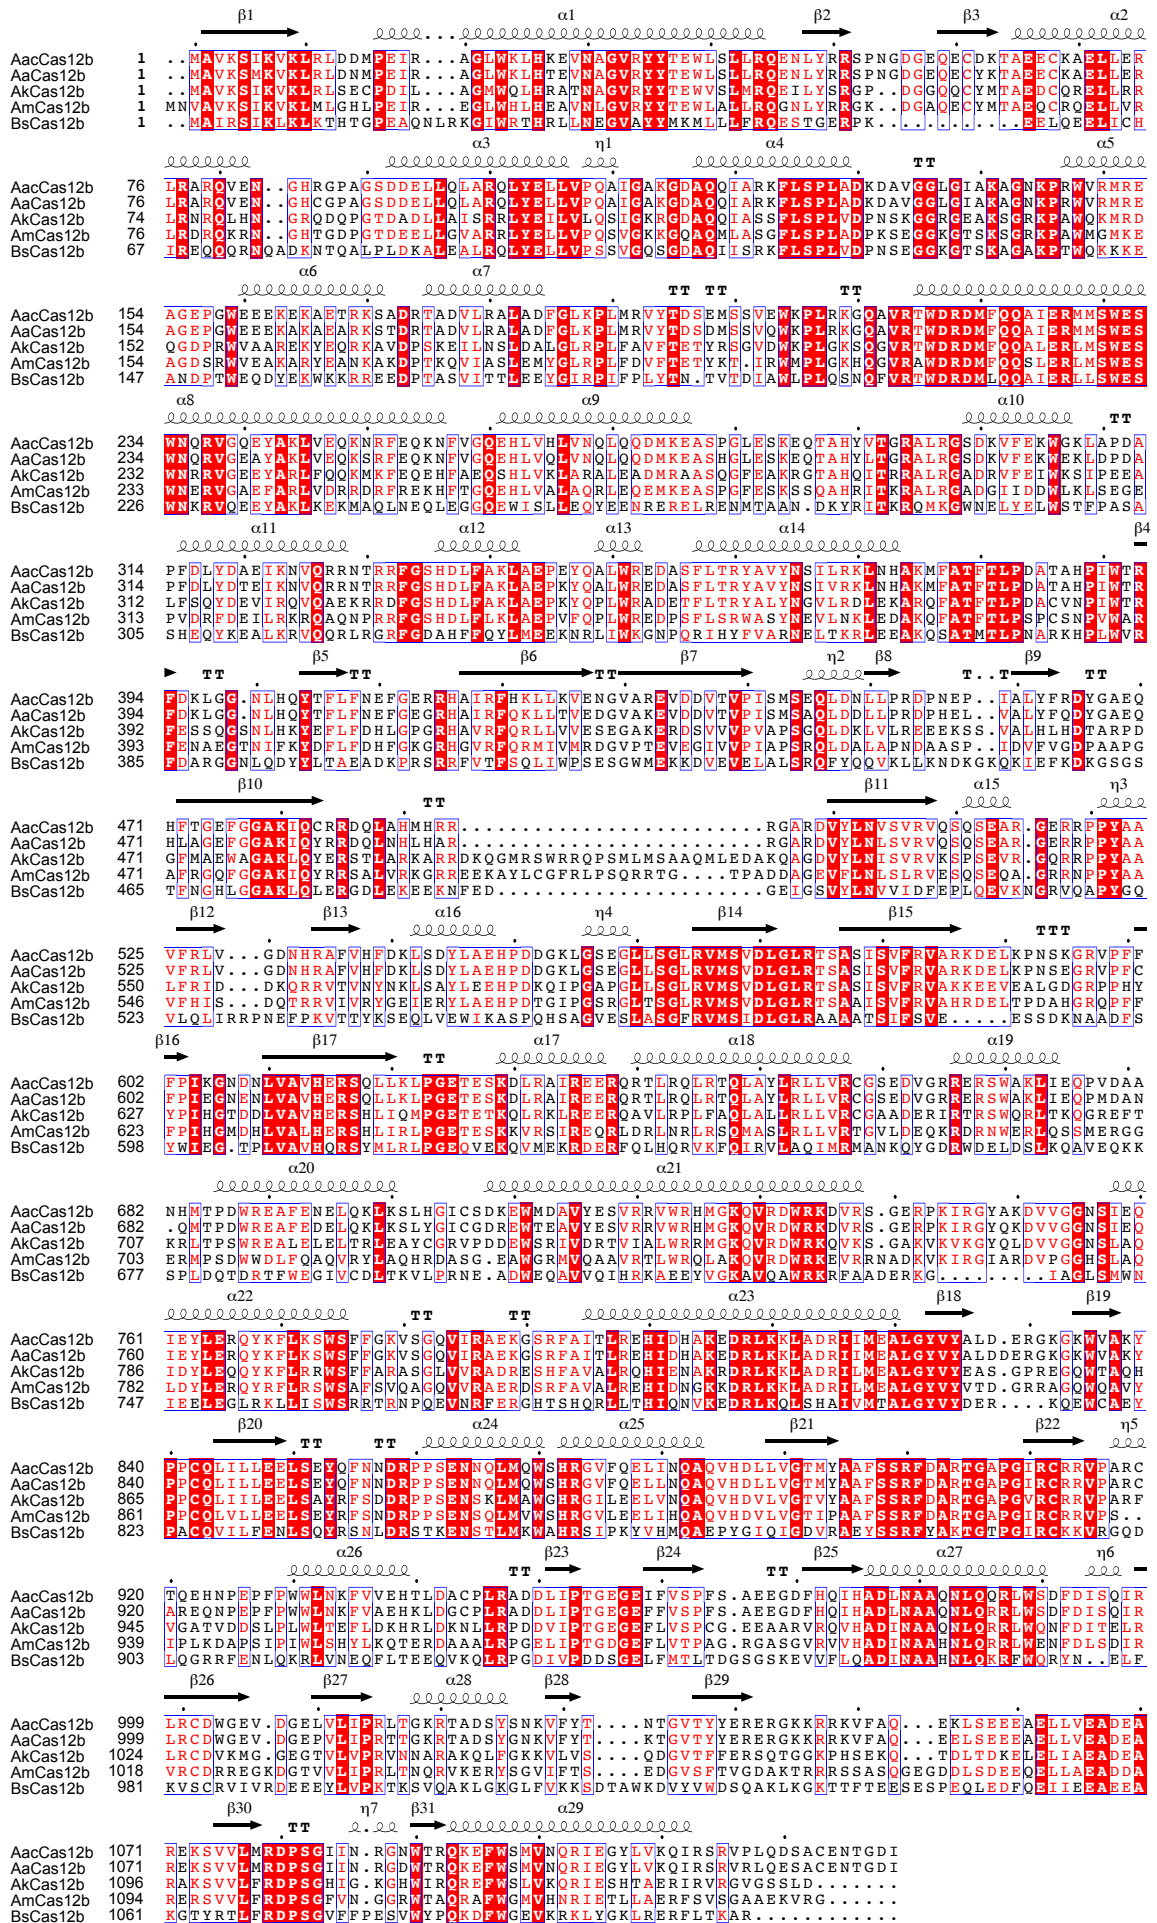

**Fig. S7 Protein alignment of Cas12b orthologs.** Multiple sequence alignment of amino acid sequences of AaCas12b, AkCas12b, AmCas12b and BsCas12b shows highly conserved residues. Strict identical residues are highlighted with the red background and conserved mutations are highlighted with an outline and red font.

# Figure S8

**a**

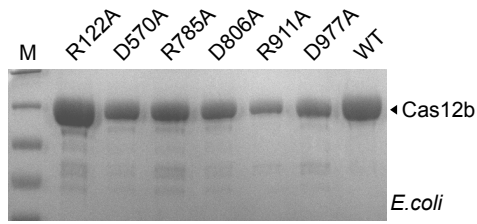

**b**

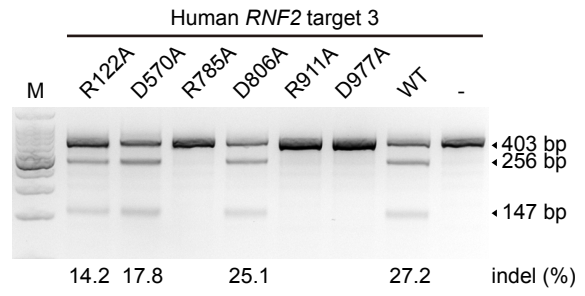

**c**

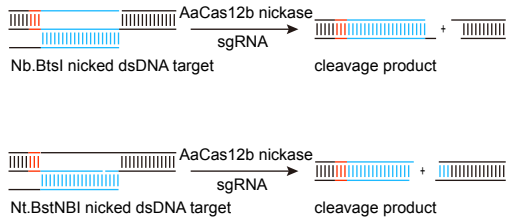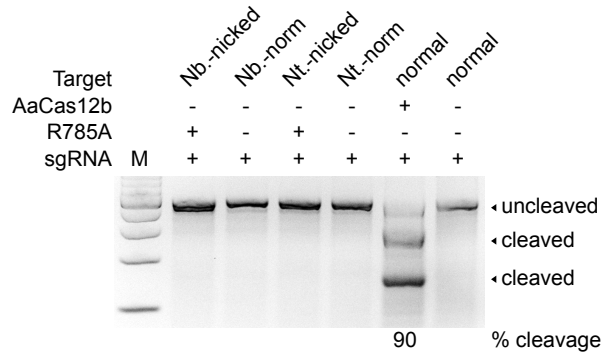



**Fig. S8 Catalytic residues required for AaCas12b-mediated DNA cleavage.** **a** Coomassie blue staining of AaCas12b variants (R122A, D570A, R785A, D806A, R911A and D977A) and WT purified from *E. coli*. **b** Effect of mutation of catalytic residues of AaCas12b on DNA targeting in 293FT cells. The indel rate is shown under the lanes with mutation. GFP, an empty backbone vector without Cas12b protein expression. **c** (*Left*) Schematic of *in vitro* cleavage of Nb.BtsI- and Nt.BstNBI-nicked dsDNA fragments using site-directed mutated AaCas12b. (*Right*) *In vitro* nicked dsDNA cleavage analysis of the catalytic residue R785A of AaCas12b. The cleavage rate is shown under the cleaved lanes.

# Figure S9

**a**

| Target gene | No. of injected embryos (%) | No. of 2-cell stage embryos (%) | No. of blastocysts (%) | Mutation ratio (%) (no. of mutated/total blastocysts) |
|-------------|-----------------------------|---------------------------------|------------------------|-------------------------------------------------------|
| <i>Nrl</i>  | 16                          | 12 (75)                         | 8 (50)                 | 75 (6/8)                                              |

**b**

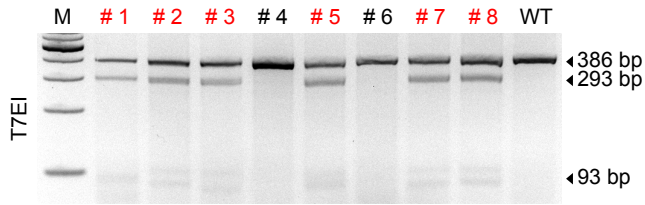

**c**

**Embryo # 1**

CAGTCCCAGAATGGCT**TTC**CCTCCCAGTCCCTTGGCTATGGAATATGTTAATGACTTTGATTTGATGAAGTTCGAAAT WT  
 CAGTCCCAGAATGGCTTTCCCTCCCAGTCCCTTGGCTATG-----ACTTTGATTTGATGAAGTTCGAAAT Δ13  
 CAGTCCCAGAATGGCTTTCCCTCCCAGTC-----attACTTTGATTTGATGAAGTTCGAAAT Δ24, +4  
 CAGTCCCAGAATGGCTTT-----GATTTGATGAAGTTCGAAAT Δ40  
 CAGTCCCAGAATG----- (Δ 233 bp)----- Δ233

**Embryo # 2**

CAGTCCCAGAATGGCT**TTC**CCTCCCAGTCCCTTGGCTATGGAATATGTTAATGACTTTGATTTGATGAAGTTCGAAAT WT  
 CAGTCCCAGAATGGCTTTCCCTCCCAGTCCCTTGG**G**---GGAATATGTTAATGACTTTGATTTGATGAAGTTCGAAAT Δ4, +1  
 CAGTCCCAGAATGGCTTTCCCTCCCAGTCCC-----TATGGAATATGTTAATGACTTTGATTTGATGAAGTTCGAAAT Δ5  
 CAGTCCCAGAATGGCTTTCCCTCCCAGTCCCTTGG-----GTTAATGACTTTGATTTGATGAAGTTCGAAAT Δ11

**Embryo # 3**

CAGTCCCAGAATGGCT**TTC**CCTCCCAGTCCCTTGGCTATGGAATATGTTAATGACTTTGATTTGATGAAGTTCGAAAT WT  
 CAGTCCCAGAATGGCTTTCCCTCCCAGTCCCTT**G**--TATGGAATATGTTAATGACTTTGATTTGATGAAGTTCGAAAT Δ2  
 CAGTCCCAGAATGGCTTTCCCTCCCAGTCCCTTGGCTA---AATATGTTAATGACTTTGATTTGATGAAGTTCGAAAT Δ3  
 CAGTCCCAGAATGGCTTTCCCTCCCAGTCCCTT**tt**----AATATGTTAATGACTTTGATTTGATGAAGTTCGAAAT Δ7, +2  
 CAGTCCCAGAATGGCTTTCCCTCCCAGTCCCT-----**ag**ATATGTTAATGACTTTGATTTGATGAAGTTCGAAAT Δ10, +2

**Embryo # 5**

CAGTCCCAGAATGGCT**TTC**CCTCCCAGTCCCTTGGCTATGGAATATGTTAATGACTTTGATTTGATGAAGTTCGAAAT WT  
 CAGTCCCAGAATGGCTTTCCCTCCCAGTCCCTT-----AATATGTTAATGACTTTGATTTGATGAAGTTCGAAAT Δ8  
 CAGTCCCAGAATGGCTTTCCCTCCCAGTCCCT-----ATATGTTAATGACTTTGATTTGATGAAGTTCGAAAT Δ10  
 CAGT**Ctctg**----- (Δ 95 bp)----- Δ95  
 CAGTCCCAGAATGGCTTTCCCTCCCAGT----- (Δ 132 bp)----- Δ132

**Embryo # 7**

CAGTCCCAGAATGGCT**TTC**CCTCCCAGTCCCTTGGCTATGGAATATGTTAATGACTTTGATTTGATGAAGTTCGAAAT WT  
 CAGTCCCAGAATGGCTTTCCCTCCCAGTCCCTT-----TGGAATATGTTAATGACTTTGATTTGATGAAGTTCGAAAT Δ5  
 CAGTCCCAGAATGGCTTTCCCTCCCAGTCCCTT-----GGAATATGTTAATGACTTTGATTTGATGAAGTTCGAAAT Δ6  
 CAGTCCCAGAATGGCTTTCCCTCCCAGTCCCT**TG**-----**c**TATGTTAATGACTTTGATTTGATGAAGTTCGAAAT Δ9, +1  
 CAGTCCCAGAATGGCTTTCCCTCCCAGTCCCT-----AATATGTTAATGACTTTGATTTGATGAAGTTCGAAAT Δ9  
 CAGTCCCAGAATGGCTTTCCCTCCCAGTCCCTT-----ATGTTAATGACTTTGATTTGATGAAGTTCGAAAT Δ11

**Embryo # 8**

CAGTCCCAGAATGGCT**TTC**CCTCCCAGTCCCTTGGCTATGGAATATGTTAATGACTTTGATTTGATGAAGTTCGAAAT WT  
 CAGTCCCAGAATGGCTTTCCCTCCCAGTCCCT**TG**-CTATGGAATATGTTAATGACTTTGATTTGATGAAGTTCGAAAT Δ1  
 CAGTCCCAGAATGGCTTTCCCTCCCAGTCCC-----ATGGAATATGTTAATGACTTTGATTTGATGAAGTTCGAAAT Δ6  
 CAGTCCCAGAATGGCTTTCCCTCCCAGTCCCT-----TATGTTAATGACTTTGATTTGATGAAGTTCGAAAT Δ11  
 CAGTCCCAGAATGGCT-----ATGGAATATGTTAATGACTTTGATTTGATGAAGTTCGAAAT Δ21

**Figure S9. Mutated embryos generated by AaCas12b RNP microinjection.** **a** Summary of mutated embryos generated by preassembled AaCas12b RNP microinjection. **b** T7EI-based genotyping analysis of mouse embryos with AaCas12b RNP injected. The red font highlighted numbers denote induced mutants. **c** Representative indels in mutated embryos in [Fig. S9b](#). Blue dashes, deleted bases; purple lowercases, insertions or mutations; red uppercases, PAM.

# Figure S10

**a**

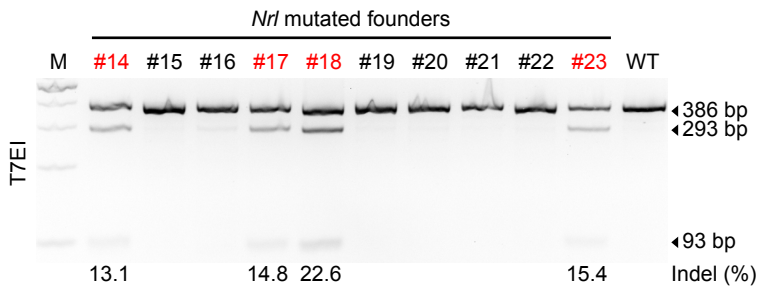

**b**

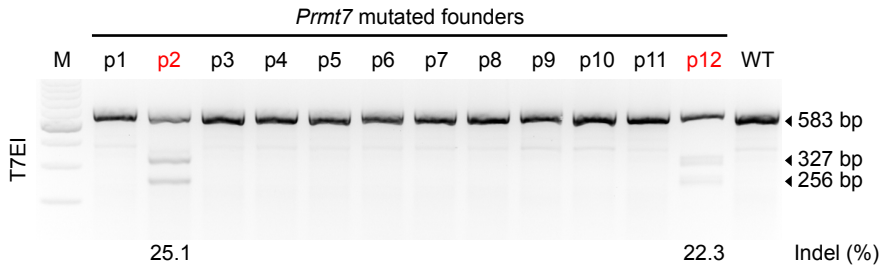

**c**

|                                                                                |         |              |               |
|--------------------------------------------------------------------------------|---------|--------------|---------------|
| <b>Mouse #1</b>                                                                |         | Indel (bp)   | Frequency (%) |
| CAGTCCCAGAATGGCTTTCCTCCAGTCCCTTGCTATGGAATATGTTAATGACTTTGATTTGATGAAGTTCGAAAT    | WT      |              |               |
| CAGTCCCAGAATGGCTTTCCCTCCAGTCC-----TAATGACTTTGATTTGATGAAGTTCGAAAT               | Δ19     | 4.8 (1/21)   |               |
| CAGTCCCAGAATGGCTTTCC-----aaAATGACTTTGATTTGATGAAGTTCGAAAT                       | Δ28, +2 | 19.0 (4/23)  |               |
| <b>Mouse #4</b>                                                                |         |              |               |
| CAGTCCCAGAATGGCTTTCCTCCAGTCCCTTGCTATGGAATATGTTAATGACTTTGATTTGATGAAGTTCGAAAT    | WT      |              |               |
| CAGTCCCAGAATGGCTTTCCCTCCAGTCCCTTG-----GAATATGTTAATGACTTTGATTTGATGAAGTTCGAAAT   | Δ5      | 28.6 (6/21)  |               |
| <b>Mouse #5</b>                                                                |         |              |               |
| CAGTCCCAGAATGGCTTTCCTCCAGTCCCTTGCTATGGAATATGTTAATGACTTTGATTTGATGAAGTTCGAAAT    |         |              |               |
| CAGTCCCAGAATGGCTTTCCCTCCAGTCC-----ATGTTAATGACTTTGATTTGATGAAGTTCGAAAT           | Δ14     | 17.2 (5/19)  |               |
| CAGTCCCAGAATGGCTTTCCCTCCAGTCCC-----GTTAATGACTTTGATTTGATGAAGTTCGAAAT            | Δ15     | 10.3 (3/19)  |               |
| <b>Mouse #8</b>                                                                |         |              |               |
| CAGTCCCAGAATGGCTTTCCTCCAGTCCCTTGCTATGGAATATGTTAATGACTTTGATTTGATGAAGTTCGAAAT    | WT      |              |               |
| CAGTCCCAGAATGGCTTTCCCTCCAGTCC-----ATGTTAATGACTTTGATTTGATGAAGTTCGAAAT           | Δ15     | 26.0 (7/26)  |               |
| <b>Mouse #9</b>                                                                |         |              |               |
| CAGTCCCAGAATGGCTTTCCTCCAGTCCCTTGCTATGGAATATGTTAATGACTTTGATTTGATGAAGTTCGAAAT    | WT      |              |               |
| CAGTCCCAGAATGGCTTTCCCTCCAGTCCCT-----TGTTAATGACTTTGATTTGATGAAGTTCGAAAT          | Δ13     | 28 (7/25)    |               |
| <b>Mouse #10</b>                                                               |         |              |               |
| CAGTCCCAGAATGGCTTTCCTCCAGTCCCTTGCTATGGAATATGTTAATGACTTTGATTTGATGAAGTTCGAAAT    | WT      |              |               |
| CAGTCCCAGAATGGCTTTCCCTCCAGTCCCTT-----GAATATGTTAATGACTTTGATTTGATGAAGTTCGAAAT    | Δ7      | 10.3 (3/29)  |               |
| CAGTCCCAGAATGGCTTTCCCTCCAGTCC-----ATATGTTAATGACTTTGATTTGATGAAGTTCGAAAT         | Δ12     | 6.7 (2/29)   |               |
| CAGTCCCAGAATGGCTTTCCCTCCAGTCCC-----TATGTTAATGACTTTGATTTGATGAAGTTCGAAAT         | Δ12     | 17.3 (5/29)  |               |
| <b>Mouse #14</b>                                                               |         | Indel (bp)   | Frequency (%) |
| CAGTCCCAGAATGGCTTTCCTCCAGTCCCTTGCTATGGAATATGTTAATGACTTTGATTTGATGAAGTTCGAAAT    | WT      |              |               |
| CAGTCCCAGAATGGCTTTCCCTCCAGTCCCTTGCTATt-----TATGTTAATGACTTTGATTTGATGAAGTTCGAAAT | Δ4, +1  | 15 (3/20)    |               |
| <b>Mouse #17</b>                                                               |         |              |               |
| CAGTCCCAGAATGGCTTTCCTCCAGTCCCTTGCTATGGAATATGTTAATGACTTTGATTTGATGAAGTTCGAAAT    | WT      |              |               |
| CAGTCCCAGAATGGCTTTCCCTCCAGTCCCTTgt-----AATATGTTAATGACTTTGATTTGATGAAGTTCGAAAT   | Δ7, +2  | 21.7 (5/23)  |               |
| <b>Mouse #18</b>                                                               |         |              |               |
| CAGTCCCAGAATGGCTTTCCTCCAGTCCCTTGCTATGGAATATGTTAATGACTTTGATTTGATGAAGTTCGAAAT    | WT      |              |               |
| CAGTCCCAGAATGGCTTTCCCTCCAGTCCCTTG-----ATATGTTAATGACTTTGATTTGATGAAGTTCGAAAT     | Δ8      | 54.5 (12/22) |               |
| <b>Mouse #23</b>                                                               |         |              |               |
| CAGTCCCAGAATGGCTTTCCTCCAGTCCCTTGCTATGGAATATGTTAATGACTTTGATTTGATGAAGTTCGAAAT    | WT      |              |               |
| CAGTCCCAGAATGGCTTTCCCTCCAGTCCC-----ATGTTAATGACTTTGATTTGATGAAGTTCGAAAT          | Δ13     | 50 (12/24)   |               |

**d**

|                                                                               |          |              |               |
|-------------------------------------------------------------------------------|----------|--------------|---------------|
| <b>Mouse p4</b>                                                               |          | Indel (bp)   | Frequency (%) |
| GAGGCTGCTGTGAAGATTGTGGAGAGGAATGGCTTCAGTGATAAGATTAAGTCATTAACAAGCACTCCACTGAGGTG | WT       |              |               |
| GAGGCTGCTGTGAAGATTGTGGAGAGGA-----gggaaatgagcCATTAAACAAGCACTCCACTGAGGTG        | Δ25, +12 | 37.8 (14/37) |               |
| <b>Mouse p12</b>                                                              |          |              |               |
| GAGGCTGCTGTGAAGATTGTGGAGAGGAATGGCTTCAGTGATAAGATTAAGTCATTAACAAGCACTCCACTGAGGTG | WT       |              |               |
| GAGGCTGCTGTGAAGATTGTGGAGAGGAATGGCT-----GATAAGATTAAGTCATTAACAAGCACTCCACTGAGGTG | Δ5       | 66.7 (16/24) |               |

**Fig. S10 Mutated mice generated by AaCas12b RNP microinjection.** **a** *Nrl* mutated founder mice generated by microinjection of AaCas12b RNPs. The numbers in red denote newborn mice with induced indel mutations. The indel rate is shown under the lanes with mutation. **b** *Prmt7* mutated founder mice generated by microinjection of AaCas12b RNPs. The numbers in red denote newborn mice with induced indel mutations. The indel rate is shown under the lanes with mutation. **c** Sanger sequencing of targeted *Nrl* alleles in mutated mice induced by injection of AaCas12b RNPs in [Fig. 5d and S10a](#). Blue dashes, deleted bases; purple lowercases, insertions or mutations; red uppercases, PAM. Indel frequencies are indicated. **d** Sanger sequencing of targeted *Prmt7* alleles in mutated mice induced by injection of AaCas12b RNPs in [Fig. S10b](#). Blue dashes, deleted bases; purple lowercases, insertions or mutations; red uppercases, PAM. Indel frequencies are indicated.

# Figure S11

**a**

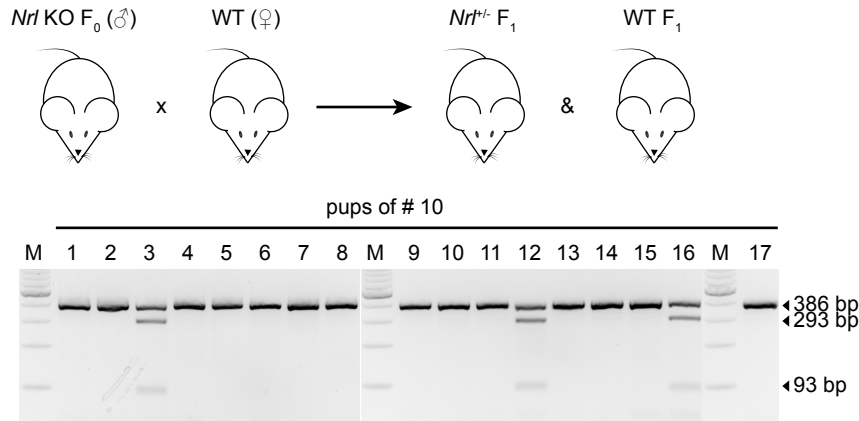

WT CCAGAATGGCTTTCCTCCAGTCCCTTGGCTATGGAATATGTTAATGACTTTGATTTGATGAAGTTCC  
 3 CCAGAATGGCTTTCCCTCCAGTCCCTT-----GAATATGTTAATGACTTTGATTTGATGAAGTTCC Δ7  
 12 CCAGAATGGCTTTCCCTCCAGTCCCTT-----GAATATGTTAATGACTTTGATTTGATGAAGTTCC Δ7  
 16 CCAGAATGGCTTTCCCTCCAGTCCCTT-----GAATATGTTAATGACTTTGATTTGATGAAGTTCC Δ7

**b**

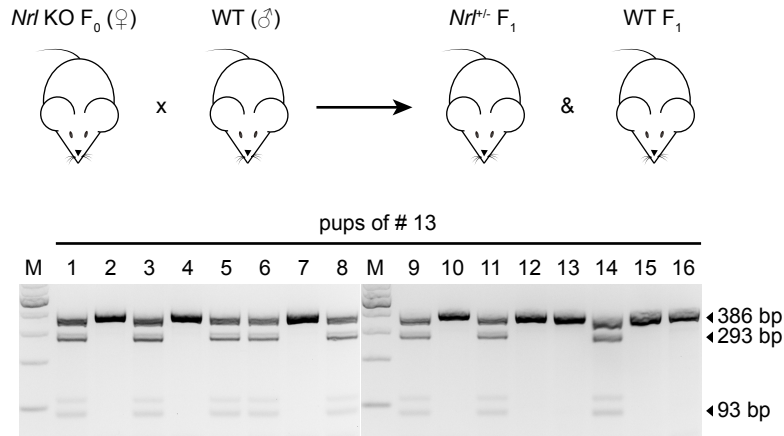

WT CCAGAATGGCTTTCCTCCAGTCCCTTGGCTATGGAATATGTTAATGACTTTGATTTGATGAAGTTCC  
 1 CCAGAATGGCTTTCCCTCCAGTCCCTT-----TGATTTGATGAAGTTCC Δ24  
 3 CCAGAATGGCTTTCCCTCCAGTCCCTT-----TGATTTGATGAAGTTCC Δ24  
 5 CCAGAATGGCTTTCCCTCCAGTCCCTT-----TGATTTGATGAAGTTCC Δ24  
 6 CCAGAATGGCTTTCCCTCCAGTCCCTT-----TGATTTGATGAAGTTCC Δ24  
 8 CCAGAATGGCTTTCCCTCCAGTCCCTT-----TGATTTGATGAAGTTCC Δ24  
 9 CCAGAATGGCTTTCCCTCCAGTCCCTT-----TGATTTGATGAAGTTCC Δ24  
 11 CCAGAATGGCTTTCCCTCCAGTCCCTT-----TGATTTGATGAAGTTCC Δ24  
 14 CCAGAATGGCTTTCCCTCCAGTCCCTT-----TGATTTGATGAAGTTCC Δ24

**Fig. S11 Successful germline transmission of mutated founders.** **a** *Nrl*-mutant male founder #10 crossed with WT female mouse (*top*) and the genotypes of the pups were determined by T7EI assay (*middle*). Sanger sequencing reads represent genotypes of mutants (*bottom*). **b** *Nrl*-mutant female founder #13 crossed with WT male mouse (*top*) and the genotypes of the pups were determined by T7EI assay (*middle*). Sanger sequencing reads represent genotypes of mutants (*bottom*).

# Figure S12

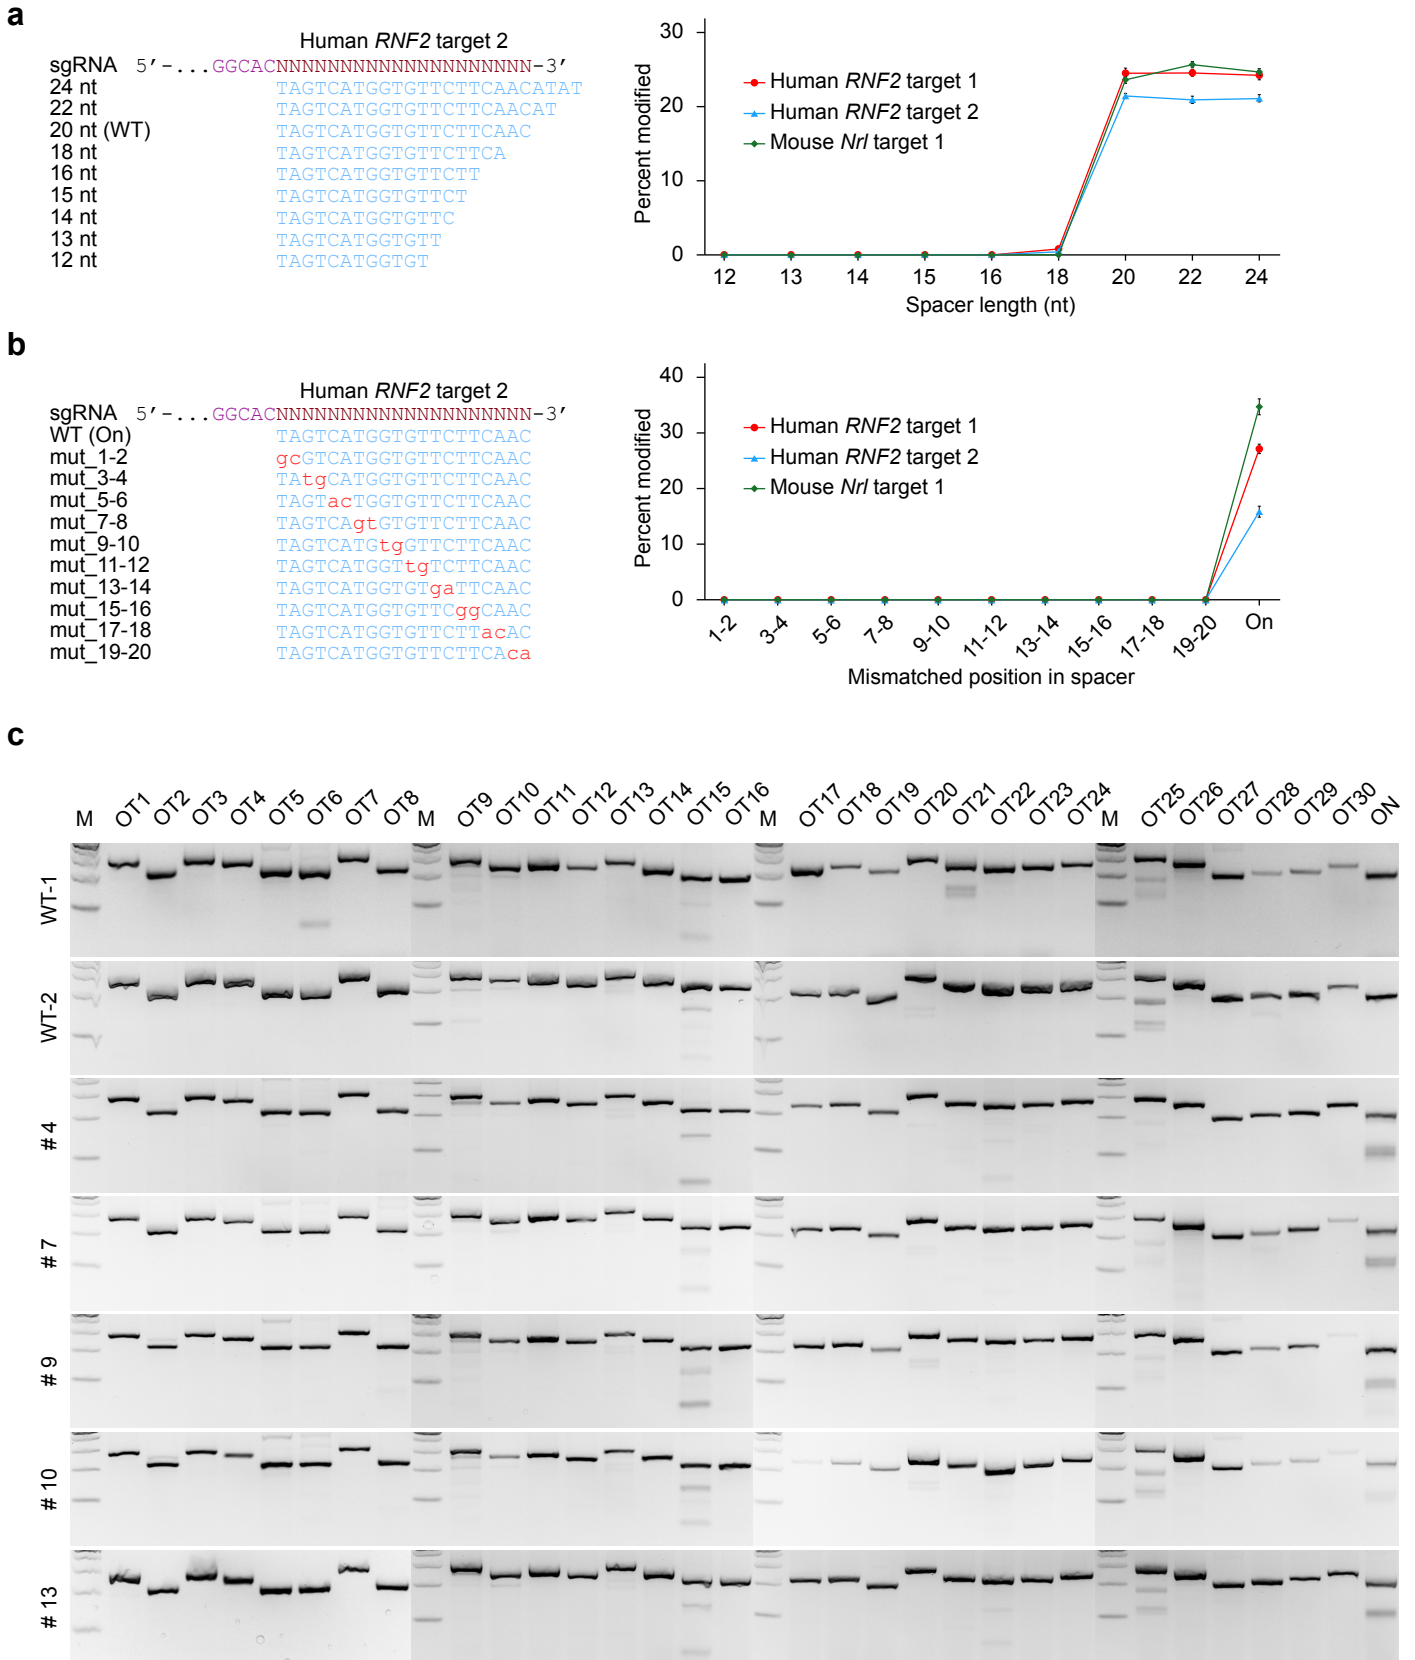



**d**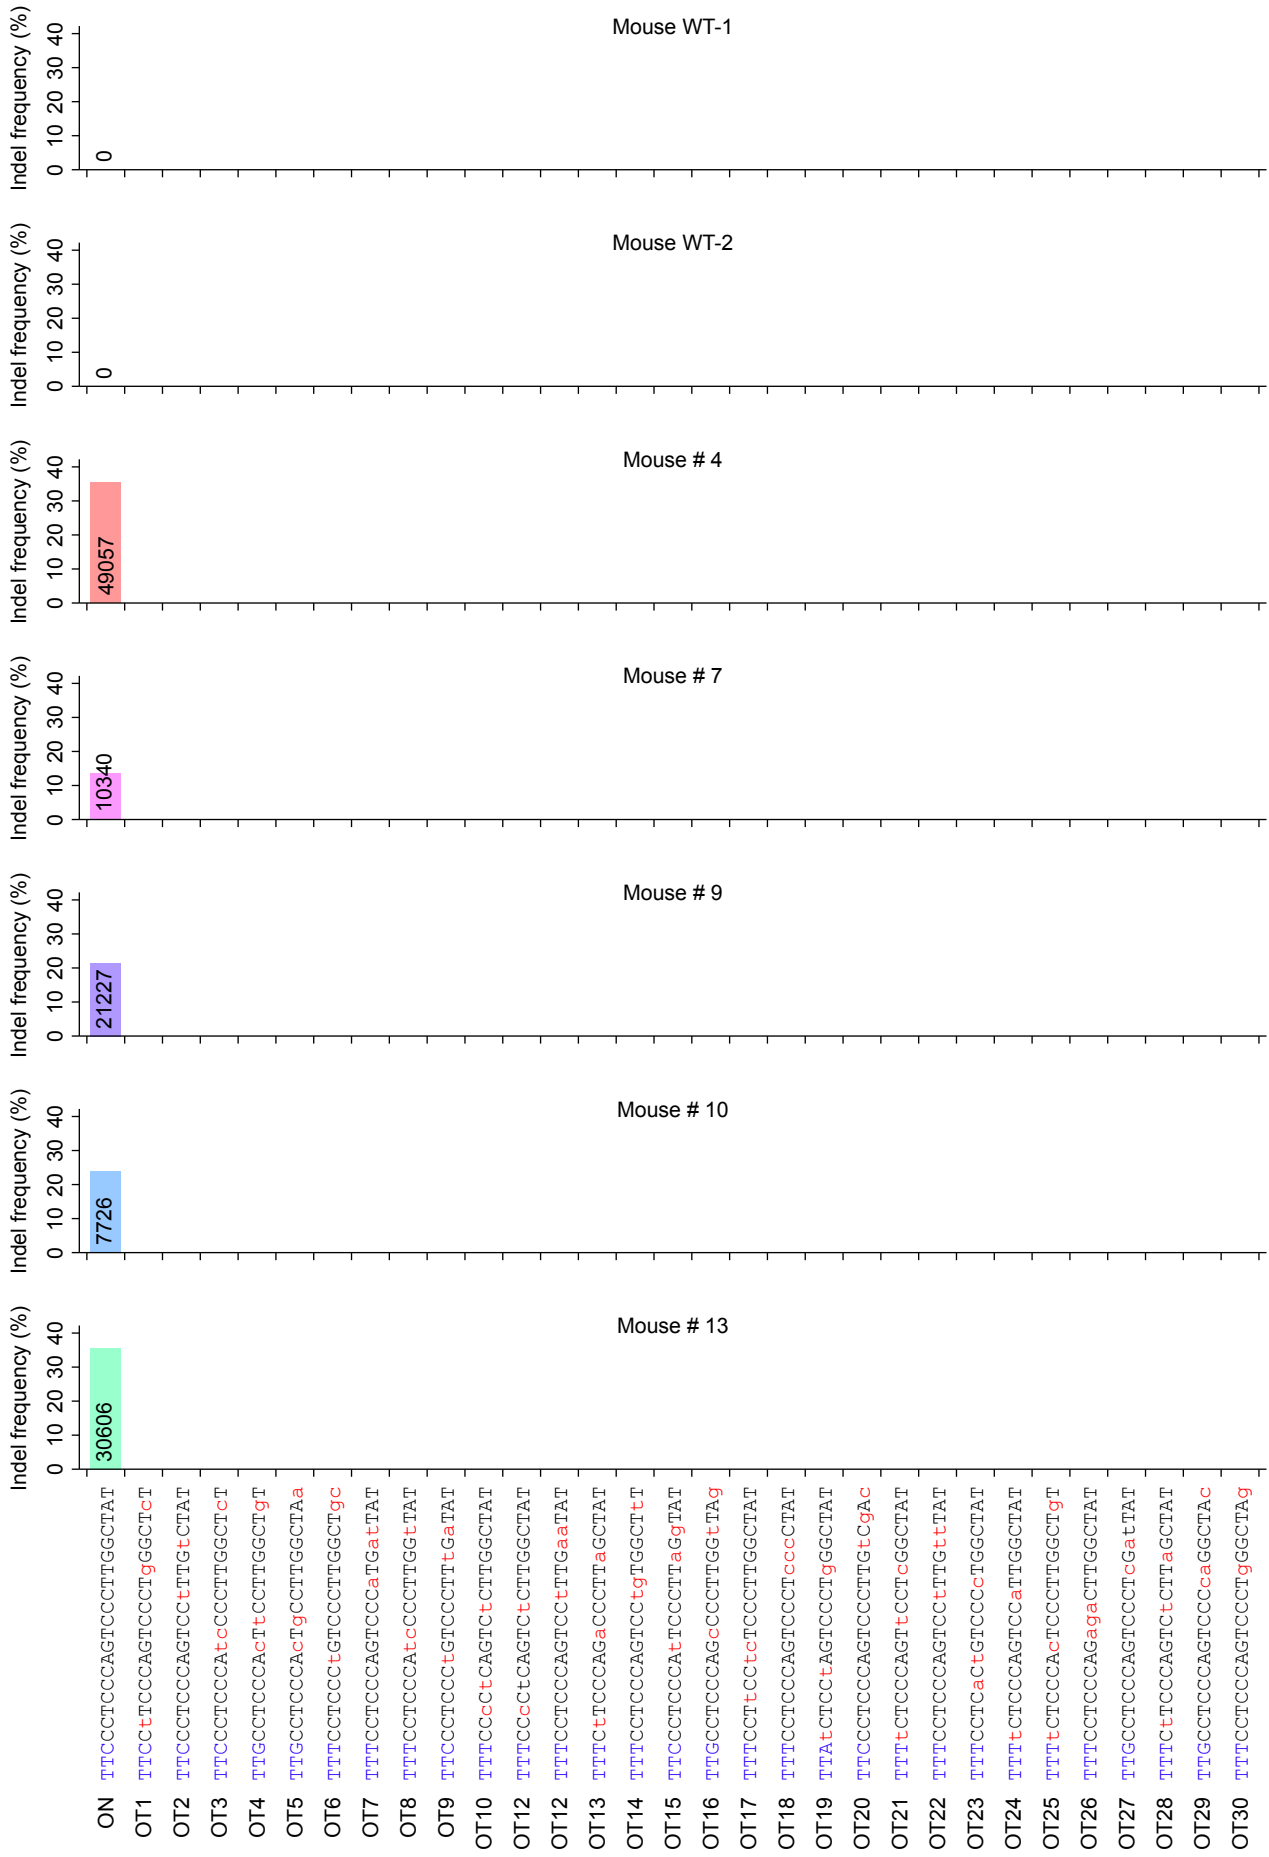

**Fig. S12 Analysis of off-target effects in mammalian genomes.** **a** Effects of spacer length on AaCas12b/sgRNA cleavage activity in human and mouse cells. Error bars indicate standard errors of the mean (s.e.m.), n = 3. **b** Analysis of cleavage specificity of AaCas12b/sgRNA in human and mouse cells using sgRNAs carrying double base-pair mismatches in the guide sequence. Error bars indicate s.e.m., n = 3. **c** T7EI analysis of the 30 potential off-targets related to *Nrl* target in the mouse genome. Two WT mice and five indicated founder mice were applied for detection and no detectable off-target effects existed by T7EI assay. **d** Pooled PCR products containing the 30 off-target sites per mice were subjected to deep sequencing. Sequences containing insertions and deletions around the cleavage site were considered to be AaCas12b-induced mutations.

# Figure S13

**a**

Sample-specific variant observed in WGS data

|            |                                |
|------------|--------------------------------|
| Chromosome | 2                              |
| Position   | 151978463                      |
| Reference  | ATTCTCACCCAGACCCTTTGCT-AGTCATC |
| Alternate  | ATTCTCACCCAGACCCTTTGCTcAGTCATC |
| Frequency  | #4 (♀) 41.0% (16 / 39)         |
|            | #7 (♀) 43.2% (16 / 37)         |
|            | #9 (♂) 40% (14 / 35)           |
|            | #10 (♂) 100% (19 / 19)         |

**b**

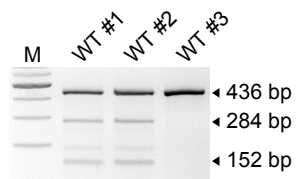

Reference TGTGTAATTCTCACCCAGACCCTTTGCT-AGTCATCTATGTT  
WT #1 TGTGTAATTCTCACCCAGACCCTTTGCTcAGTCATCTATGTT  
WT #2 TGTGTAATTCTCACCCAGACCCTTTGCTcAGTCATCTATGTT  
WT #3 TGTGTAATTCTCACCCAGACCCTTTGCT-AGTCATCTATGTT

**Fig. S13 Sample-specific variant is not induced by off-target effects.** **a** Sample-specific variant observed in WGS data. All the four *Nrl*-mutated founders contain the same variant and the indel frequencies are shown. **b** T7EI assay (*top*) and Sanger sequencing (*bottom*) showing the sample-specific variant in [Fig. 6e](#) also observed in wild-type siblings (WT #1 and #2).

# Figure S14

**a**

Human *RNF2* locus

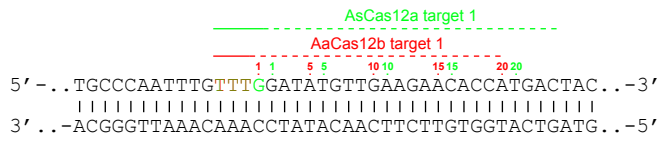

Mismatch A ↔ C T ↔ G

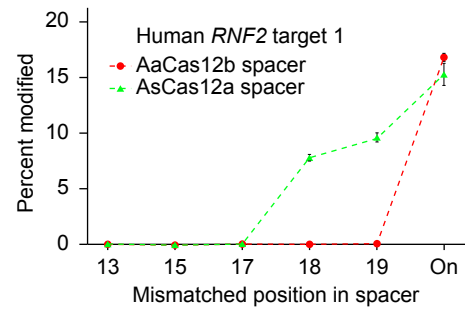

**b**

Human *RNF2* locus

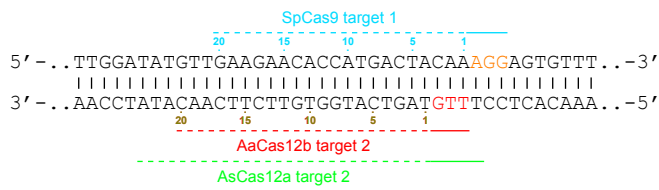

Mismatch A ↔ C T ↔ G

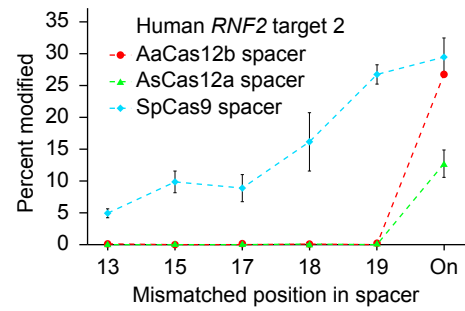

**Fig. S14 Comparison of off-target effects of AaCas12b, AsCas12a and SpCas9 in mammalian cells. a-b** (*Left*) Schematic showing the targeting sequences of AaCas12b, AsCas12a and SpCas9 in human *RNF2* locus. (*Right*) Activities of AaCas12b, AsCas12a and SpCas9 targeted to the human *RNF2* locus using respective guide RNAs with single mismatches in human 293FT cells. Mutation frequencies were assessed by T7EI assay. Error bars indicate standard errors of the mean (s.e.m.), n = 3.

# Figure S15

**a**

Human *CCR5* locus

```

5' - . . TCTCCTGAACACCTTCCAGGAATTCTTTGGCCTGAATAA . . -3'
      |||
3' - . . AGAGGACTTGTGGAAGGTCCTTAAGAAACCGGACTTATT . . -5'
      |||
      AaCas12b target 3
      -----
      SpCas9 target 2
  
```

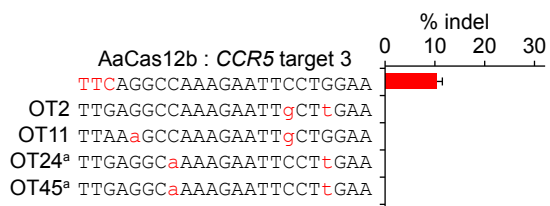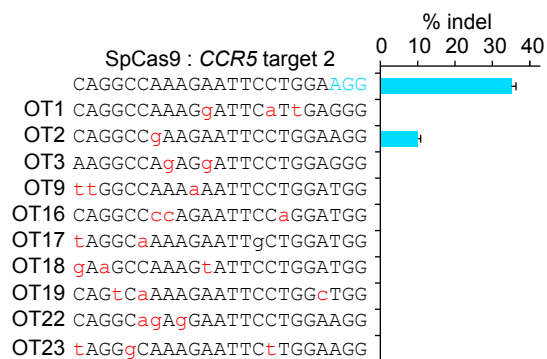

**b**

Human *CCR5* locus

```

      SpCas9 target 3
      -----
      AaCas12b target 1
      -----
5' - . . TCATGATTGTTTATTTCCTCTTCGGGCTCCCTACAACA . . -3'
      |||
3' - . . AGTACTAACAAATAAAAGAGAAGACCCGAGGGATGTTGT . . -5'
      |||
  
```

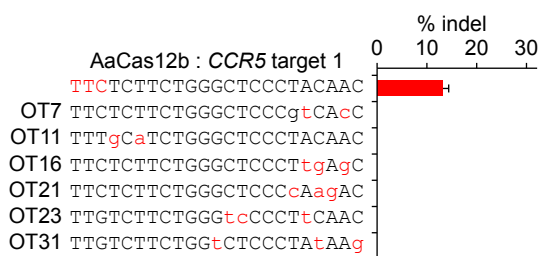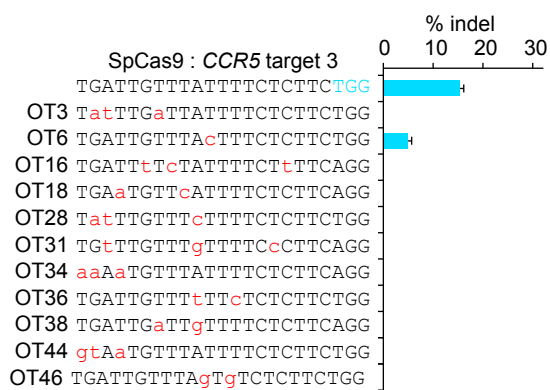

**Fig. S15 AaCas12b generates minimal genome-wide off-target effects compared to SpCas9. a-b** (*Upper*) Schematic showing the targeting sequences of AaCas12b and SpCas9 in the human *CCR5* locus. (*Lower*) Frequencies of induced indels at on- and off-target sites by AaCas12b and SpCas9 in human 293FT cells. Mutation frequencies were assessed by T7EI assay. Error bars indicate standard errors of the mean (s.e.m.), n = 2.



**Table S1. Oligonucleotides (oligos) used for Cas12b coding gene and guide RNA synthesis.**

See separate Excel file

**Table S2. Target sequences bearing various 5' PAM sequences used for *in vitro* DNA cleavage assay.**

Target sequences used for *in vitro* DNA cleavage analysis of PAM sequences were commercially synthesized with EcoRI 5' and SphI 3' overhangs highlighted with yellow and green backgrounds, respectively. Annealed oligos were constructed into EcoRI and SphI double-digested p11-LacY-wtx1 vector.

See separate Excel file

**Table S3. Protospacer sequences of mammalian genomic targets.**

Protospacer targets designed based on CRISPR-Cas12b loci with their requisite PAMs against different genes in human and mouse genomes. The PAMs are highlighted in blue uppercase and mismatches in red lowercase.

See separate Excel file

**Table S4. Frequency of AaCas12b-induced indel mutations at potential off-target sites in mammalian genomes.**

Sites in the human and mouse genomes bearing 1 to 3 mismatches from the *CCR5*, *RNF2* and *Nr1* on-target sites for AaCas12b were detected by targeted deep sequencing. PAMs were highlighted in red, and mismatches were within lowercase.

See separate Excel file

**Table S5. Frequency of AaCas12b- and SpCas9-induced indel mutations at potential off-target sites in human 293FT cells.**

Sites in the human genome bearing 1 to 3 mismatches from the *CCR5* and *RNF2* on-target sites for AaCas12b and SpCas9 were detected by T7EI assay. PAMs were highlighted in red, and mismatches were within lowercase.

See separate Excel file

**Table S6. List of primer sequences used in this study.**

See separate Excel file

## Supplementary Sequences

Accession information for the four Cas12b orthologs and vectors used in this study.

**Cas12b coding sequence from *Alicyclobacillus acidiphilus* NBRC 100859 (GeneBank ID: NZ\_BCQI01000053.1)**

```
ATGGCCGTTAAATCCATGAAAGTGAAACTTCGCCTCGATAATATGCCGGAGATTCGGGCTGG
TTTATGGAAACTCCATACGGAGGTCAACGCGGGGGTTCGATATTACACGGAATGGCTGAGTC
TTCTGCGTCAAGAGAATTTGTATCGAAGAAGTCCGAATGGGGACGGAGAGCAAGAATGTTAT
AAGACTGCAGAAGAATGCAAAGCCGAATTGTTGGAGCGGCTGCGCGCGCTCAAGTGGAGAA
TGGACACTGTGGTCCGGCGGGATCGGACGATGAATTGCTGCAGTTGGCTCGTCAACTTTATG
AACTGTTGGTTCGCGAGGCGATAGGTGCGAAAGGCGATGCGCAGCAAATGCGCGCAAGTTT
TTGAGCCCCTTAGCCGACAAGGATGCAGTGGGTGGGCTTGGAAATCGCGAAGGCGGGGAACAA
ACCGCGGTGGTTCGCATGCGCGAAGCGGGAGAACCTGGCTGGGAAGAGGAGAAGGCGAAGG
CTGAGGCGAGGAAATCTACGGATCGAACTGCGGATGTTTTGCGCGCGCTCGCGGATTTTGGG
TTAAAGCCACTGATGCGCGTGTACACCGATTCTGACATGTCATCTGTTCAAGTGGAAACCGCT
TCGGAAGGGCCAAGCGGTTTCGGACGTGGGACAGGGATATGTTCCAACAGGCCATCGAGCGGA
TGATGTCGTGGGAGTCGTGGAATCAGCGCGTTGGCGAAGCGTACGCGAAACTGGTAGAGCAA
AAAAGTCGATTTGAGCAGAAGAACTTCGTCGGCCAGGAACATTTGGTTCAACTCGTCAATCA
GTTGCAACAAGATATGAAAGAAGCATCGCACGGGCTCGAATCGAAAGAGCAAACCCGCACATT
ATCTGACGGGACGGGCATTGCGCGGATCGGACAAAGTGTGTTGAGAAGTGGGAGAACTCGAC
CCTGATGCGCCATTCGATTTGTACGACACCGAAATCAAGAACGTGCAGAGACGTAACACGAG
GCGATTCGGCTCACACGACTTGTTCGCGAAATTTGGCGGAACCGAAGTATCAGGCCCTGTGGC
GCGAAGATGCTTTCGTTTTCTCACGCGTTACGCGGTGTACAACAGCATCGTTTCGCAAACCTGAAT
CACGCCAAAATGTTTCGCGACGTTTACTTTACCGGATGCAACTGCGCATCCGATTTGGACTCG
CTTTGATAAAATTTGGGCGGGAATTTGCACCAGTACACCTTTTTGTTCAACGAATTCGGAGAAG
GCAGGCACGCGATTTCGTTTTCAAAGCTGTTGACCGTCAAGATGGTGTTCGAAAAGAAGTT
GATGATGTAACGGTGCACATTTCCATGTGACGCAATTTGGATGATCTGCTGCCAAGAGATCC
CCATGAACTGGTTGCACTATATTTTCAAGATTATGGAGCCGAACAGCATTTGGCGGGTGAAT
TCGGTGGCGCGAAGATTCAGTACCGTTCGGGATCAACTAAATCATTTGCACGCACGCAGAGGG
GCGAGGGATGTTTATCTCAATCTCAGCGTACGTGTGCAGAGCCAGTCTGAGGCACGGGGAGA
ACGCCGCCCGCGTATGCCGCAGTATTCGCCTGGTTCGGGGACAACCATCGTGCCTTTGTCC
ATTTTGATAAAATATCGGATATCTTTCGCGAACATCCGGATGATGGGAAGCTTGGATCGGAG
GGGCTGCTTTCCGGGCTACGGGTGATGAGTGTGCATCTCGGCCTTCGCACATCGGCATCGAT
TTCCGTTTTTTCGCGTTGCCCGGAAGGACGAGTTGAAGCCGAACTCGGAAGGGCGTGTCCCAT
TCTGTTTTCCGATTGAAGGGAATGAAAATCTCGTCGCGGTTTCATGAACGATCTCAACTTTTG
AAGCTGCCTGGCGAAACAGAGTCAAAGGACCTGCGGGCTATCCGAGAAGAGCGCCAACGGAC
CCTGCGGCAGCTGCGGACGCAACTGGCGTATTTGCGGCTGCTCGTGCAGTGTGGGTTCGGAAG
ATGTGGGACGGCGTGAACGGAGTTGGGCAAAGCTTATTGAGCAGCCCATGGATGCCAATCAG
ATGACACCGGATTTGGCGGAAGCCTTTGAAGACGAACTTCAGAAGCTTAAGTCACTCTATGG
TATCTGTGGCGACAGGGAATGGACGGAGGCTGTCTACGAGAGCGTTCGCCGCGTGTGGCGCC
ATATGGGCAAACAGGTTTCGCGATTGGCGAAAGGACGTACGGAGTGGAGAGCGGCCGAAGATT
CGCGGCTATCAAAAAGATGTGGTTCGGCGGAAATTCGATTGAGCAAATGAGTATCTTGAACG
```

GCAGTACAAGTTTCTCAAGAGTTGGAGCTTTTTTGGCAAGGTATCGGGACAAGTGATTTCGTG  
CGGAGAAGGGATCCCGATTTGCGATCACGCTGCGTGAACACATTGATCACGCGAAGGAAGAC  
CGGCTGAAGAAATTGGCGGATCGCATCATTATGGAGGCGCTCGGTTATGTGTACGCGTTGGA  
TGATGAGCGCGGCAAAGGAAAAGTGGGTTGCGAAGTATCCGCCGTGCCAGCTCATCCTGCTGG  
AGGAATTGAGCGAGTACCAGTTCATAACGACAGGCCCTCCGAGTGAAAACAATCAGTTGATG  
CAATGGAGCCATCGCGGCGTGTTCAGGAGTTGTTGAATCAGGCCCAAGTCCACGATTTACT  
CGTTGGGACGATGTATGCAGCGTTCTCGTCGCGATTTCGACGCGCGAACCAGGGGCACCGGGTA  
TCCGCTGTGCGCAGGGTACCGGCGCGTTGCGCTCGGGAGCAGAATCCAGAACCATTTCCCTTGG  
TGGCTGAACAAGTTTGTGGCGGAACACAAGTTGGATGGTTGTCCCTTACGGGCAGACGACCT  
CATCCCCACGGGTGAAGGAGAGTTTTTTTGTCTCGCCGTTTCAGTGCGGAGGAAGGGGACTTTC  
ATCAGATTCATGCCGACCTGAATGCGGCGCAAACCTGCAGCGGCGACTCTGGTCTGATTTT  
GATATCAGTCAAATTCGGTTGCGGTGTGATTGGGGTGAAGTGGACGGTGAACCCGTTCTGAT  
CCCAAGGACCACAGGAAAGCGAACGGCGGATTCATATGGCAACAAGGTGTTTTATACCAAAA  
CAGGTGTCACCTATTATGAGCGAGAGCGGGGAAGAAGCGGAGAAAGGTTTTTCGCGCAAGAG  
GAATTGTCGGAGGAAGAGGCGGAGTTGCTTGTGGAAGCAGACGAGGCAAGGGAGAAATCGGT  
CGTTTTGATGCGTGATCCGTCCGGCATTATCAATCGTGGCGACTGGACCAGGCAAAAAGGAGT  
TTTGGTCGATGGTGAACCAGCGGATTGAAGGATACTTGGTCAAGCAGATTTCGCTCGCGCGTT  
CGCTTACAAGAAAGTGCCTGTGAAAACACGGGGGATATT

### **Humanized AaCas12b coding sequence**

ATGGCCGTGAAGAGCATGAAGGTGAAGCTGCGCCTGGACAACATGCCCGAGATCCGCGCCGG  
CCTGTGGAAGCTGCACACCGAGGTGAACGCCGGCGTGCGCTACTACACCGAGTGGCTGAGCC  
TGCTGCGCCAGGAGAACCTGTACCGCCGACGCCCCAACGGCGACGGCGAGCAGGAGTGCTAC  
AAGACCGCCGAGGAGTGCAAGGCCGAGCTGCTGGAGCGCCTGCGCGCCCGCCAGGTGGAGAA  
CGGCCACTGCGGCCCCGCCGGCAGCGACGACGAGCTGCTGCAGCTGGCCCGCCAGCTGTACG  
AGCTGCTGGTGCCCCAGGCCATCGGCGCCAAGGGCGACGCCAGCAGATCGCCCGCAAGTTC  
CTGAGCCCCCTGGCCGACAAGGACGCCGTGGGCGGCCCTGGGCATCGCCAAGGCCGGCAACAA  
GCCCCGCTGGGTGCGCATGCGCGAGGCCGCGGAGCCCGCTGGGAGGAGGAGAAGGCCAAGG  
CCGAGGCCCGCAAGAGCACCGACCGCACCGCCGACGTGCTGCGCGCCCTGGCCGACTTCGGC  
CTGAAGCCCCCTGATGCGCGTGTACACCGACAGCGACATGAGCAGCGTGCAGTGGAAGCCCCT  
GCGCAAGGGCCAGGCCGTGCGCACCTGGGACCGCGACATGTTCCAGCAGGCCATCGAGCGCA  
TGATGAGCTGGGAGAGCTGGAACCAGCGGTGGGCGAGGCCCTACGCCAAGCTGGTGGAGCAG  
AAGAGCCGCTTCGAGCAGAAGAACTTCGTGGGCCAGGAGCACCTGGTGCAGCTGGTGAACCA  
GCTGCAGCAGGACATGAAGGAGGCCAGCCACGGCCTGGAGAGCAAGGAGCAGACCGCCCACT  
ACCTGACCGGCCGCGCCCTGCGCGGACGACAAGGTGTTTCGAGAAGTGGGAGAAGCTGGAC  
CCCGACGCCCCCTTCGACCTGTACGACACCGAGATCAAGAACGTGCAGCGCCGCAACACCCG  
CCGCTTCGGCAGCCACGACCTGTTCCGCAAGCTGGCCGAGCCCAAGTACCAGGCCCTGTGGC  
GCGAGGACGCCAGCTTCCTGACCCGCTACGCCGTGTACAACAGCATCGTGCGCAAGCTGAAC  
CACGCCAAGATGTTCCGCCACCTTACCCTGCCGACGCCACCGCCCAACCCATCTGGACCCG  
CTTCGACAAGCTGGGCGGCAACCTGCACCAGTACACCTTCCTGTTCAACGAGTTCGGCGAGG  
GCCGCCACGCCATCCGCTTCCAGAAGCTGCTGACCGTGGAGGACGGCGTGGCCAAGGAGGTG  
GACGACGTGACCGTGCCATCAGCATGAGCGCCAGCTGGACGACCTGCTGCCCGCGACCC  
CCACGAGCTGGTGGCCCTGTACTTCCAGGACTACGGCGCCGAGCAGCACCTGGCCGGCGAGT  
TCGGCGGCGCCAAGATCCAGTACCGCCGCGACCAAGCTGAACCACCTGCACGCCCGCCGCGGC

GCCCGCGACGTGTACCTGAACCTGAGCGTGCGCGTGCAGAGCCAGAGCGAGGCCCGCGGCGA  
GCGCCGCCCCCTACGCCCGCTGTTCCGCCTGGTGGGCGACAACCACCGCGCCTTCGTGC  
ACTTCGACAAGCTGAGCGACTACCTGGCCGAGCACCCCGACGACGGCAAGCTGGGCAGCGAG  
GGCCTGCTGAGCGGCCTGCGCGTGATGAGCGTGGACCTGGGCCTGCGCACCAGCGCCAGCAT  
CAGCGTGTTCGCGTGGCCCGCAAGGACGAGCTGAAGCCCAACAGCGAGGGCCGCGTGCCCT  
TCTGCTTCCCCATCGAGGGCAACGAGAACCTGGTGGCCGTGCACGAGCGCAGCCAGCTGCTG  
AAGCTGCCCCGGCGAGACCGAGAGCAAGGACCTGCGCGCCATCCGCGAGGAGCGCCAGCGCAC  
CCTGCGCCAGCTGCGCACCCAGCTGGCCTACCTGCGCCTGCTGGTGCCTGCGGCAGCGAGG  
ACGTGGGCCCGCGGAGCGCAGCTGGGCCAAGCTGATCGAGCAGCCATGGACGCCAACCAG  
ATGACCCCCGACTGGCGGAGGCCTTCGAGGACGAGCTGCAGAAGCTGAAGAGCCTGTACGG  
CATCTGCGGGACCGCGAGTGGACCGAGGCCGTGTACGAGAGCGTGCGCCGCGTGTGGCGCC  
ACATGGGCAAGCAGGTGCGGACTGGCGCAAGGACGTGCGCAGCGGCGAGCGCCCCAAGATC  
CGCGGCTACCAGAAGGACGTGGTGGGCGCAACAGCATCGAGCAGATCGAGTACCTGGAGCG  
CCAGTACAAGTTCCTGAAGAGCTGGAGCTTCTTCGGCAAGGTGAGCGGCCAGGTGATCCGCG  
CCGAGAAGGGCAGCCGCTTCGCCATCACCCCTGCGCGAGCACATCGACCACGCCAAGGAGGAC  
CGCCTGAAGAAGCTGGCCGACCGCATCATCATGGAGGCCCTGGGCTACGTGTACGCCCTGGA  
CGACGAGCGCGGCAAGGGCAAGTGGGTGGCCAAGTACCCCCCTGCCAGCTGATCCTGCTGG  
AGGAGCTGAGCGAGTACCAGTTCACAACAGACCGCCCCCAGCGAGAACAACCAGCTGATG  
CAGTGGAGCCACCGCGGCGTGTTCAGGAGCTGCTGAACCAGGCCAGGTGCACGACCTGCT  
GGTGGGCACCATGTACGCCCTTCAGCAGCCGCTTCGACGCCCGCACCGGGCGCCCCGGCA  
TCCGCTGCCGCCGCGTGCCCGCCGCTGCGCCCGCGAGCAGAACCCGAGCCCTTCCCCTGG  
TGGCTGAACAAGTTCGTGGCCGAGCACAAGCTGGACGGCTGCCCCCTGCGCGCCGACGACCT  
GATCCCCACCGGCGAGGGCGAGTTCCTTCGTGAGCCCTTCAGCGCCGAGGAGGGCGACTTCC  
ACCAGATCCACGCCGACCTGAACGCCGCCAGAACCTGCAGCGCCGCTGTGGAGCGACTTC  
GACATCAGCCAGATCCGCTGCGCTGCGACTGGGGCGAGGTGGACGGCGAGCCCGTGCTGAT  
CCCCCGACACCAGGCAAGCGCACCGCCGACAGCTACGGCAACAAGGTGTTCTACACCAAGA  
CCGGCGTGACCTACTACGAGCGCGAGCGGGCAAGAAGCGCCGCAAGGTGTTTCGCCAGGAG  
GAGCTGAGCGAGGAGGAGGCCGAGCTGCTGGTGGAGGCCGACGAGGCCCGCGAGAAGAGCGT  
GGTGTGATGCGGACCCCAGCGGCATCATCAACCGCGGCGACTGGACCCGCCAGAAGGAGT  
TCTGGAGCATGGTGAACCAGCGCATCGAGGGCTACCTGGTGAAGCAGATCCGCAGCCGCGTG  
CGCCTGCAGGAGAGCGCCTGCGAGAACACCGGCGACATC

### **AaCas12b protein sequence**

MAVKSMKVKLRLDNMPEIRAGLWKLHTEVNAGVRYYTEWLSLLRQENLYRRSPNGDGEQECY  
KTAEECKAELLERLRARQVENGHCGPAGSDDELLQLARQLYELLVPQAIGAKGDAQQIARKF  
LSPLADKDAVGGGLGIAKAGNKPRWVRMREAGEPGWEEKAKAEARKSTDRADVLRALADFG  
LKPLMRVYTDSDMSSVQWKPLRKGQAVRTWDRDMFQQA IERMMSWESWNQRVGEAYAKLVEQ  
KSRFEQKNFVGQEHLVQLVNQLQQDMKEASHGLESKEQTAHYLTGRALRGS DKVFEEKWEKLD  
PDAPFDLYDTEIKNVQRNTRRFGSHDLFAKLAEPKYQALWREDASFLTRYAVYNSIVRKLN  
HAKMFATFTLPDATAHP IWTRFDKLGGNLHQYTFLFNEFGGRHAIRFQKLLTVEDGVAKEV  
DDVTVPISMSAQLDDLLPRDPHELVALYFQDYGAEQHLAGEFGGAKIQYRRDQLNHLHARRG  
ARDVYLNLSVRVQSQSEARGERRPPYAAVFRLVGDNHRAFVHFDKLSDYLAEHPDDGKLGSE  
GLLSGLRVMSVDLGLRTSASISVFRVARKDELKPNSEGRVPFCFPIEGNENLVAVHERSOLL  
KLPGETESKDLRAIREERQRTLRLQLRTQLAYLRLLVRCGSEDVGRRERSWAKLIEQPMDANQ

MTPDWREAFEDDELQKLSLYGICGDREWTEAVYESVRRVWRHMGKQVRDWRKDVRSGERP  
RKYQKDVVGGNSIEQIEYLERQYKFLKSWFFGKVSQVIRAEKGSRFAITLREHIDHAKED  
RLKKLADRIIMEALGYVYALDDERGGKWKVAKYPPCQLILLEELSEYQFNDRPPSENNQLM  
QWSHRGVFQELLNQAQVHDLLVGTMYAAFSSRFDARTGAPGIRCRVPARCAREQNPEFPW  
WLNKFVAEHKLDGCPLRADDLIPTGEGEFFVSPFSAEEGDFHQIHADLNAAQNLQRRLWSD  
DISQIRLRCDWGEVDGEPVLI PRTTGKRTADSYGNKVIFYTKTGVTYYERERGGKRRKVF  
ELSEEEAELLVEADEAREKSVVLMRDPGSIINRGDWTRQKEFWSMVNQRIEGYLVKQIRSRV  
RLQESACENTGDI

**Cas12b coding sequence from *Alicyclobacillus kakegawensis* NBRC 103104 (GeneBank ID:**

**NZ\_BCRP01000027.1)**

ATGGCTGTAAAATCTATTAAGGTCAAGTTGCGGTTGTCAGAGTGCCAGACATCCTGGCTGG  
CATGTGGCAGCTCCACCGGGCGACAAACGCGGGGTTTCGATACTACACAGAATGGGTGAGCT  
TGATGCGCCAGGAGATCCTCTACTCGCGCGGGCCGGACGGCGGTGAGCAGTGCTACATGACC  
GCGGAGGATTGCCAACGCGAGCTGCTGCGGGCGGCTGCGCAATCGCCAGCTCCATAATGGCCG  
CCAGGACCAGCCCGGTACAGATGCAGACCTACTGGCAATCAGTAGGAGACTCTATGAAATTC  
TGGTCTGCAATCCATCGGCAAGAGGGGGACGCCAGCAGATAGCGAGCAGCTTCTCTCAGC  
CCTCTGGTCGATCCGAACTCCAAAGGTGGGCGGGGTGAAGCCAAGTCCGGTCGAAAGCCTGC  
GTGGCAGAAGATGCGCGATCAAGGTGATCCTCGTTGGGTGCGGCAAGGGAAAAGTACGAGC  
AACGCAAGGCGGTTGATCCATCTAAAGAAAATCCTGAATTCATTGGACGCCCTGGGTCTCAGG  
CCGCTATTTGCGGTCTTACGGAGACCTACAGGTGCGGAGTCGATTGGAAGCCGCTCGGCAA  
AAGCCAAGGTGTGCGCACATGGGACCGTGACATGTTCCAGCAGGCCCTCGAGCGCCTGATGT  
CCTGGGAGTCTTGAACCGCCGCGTGGGCGAGGAGTACGCCCGTCTTTTCCAACAGAAGATG  
AAGTTCGAGCAGGAACACTTCGCGAACAGTCTCATCTGGTTAAACTGGCGCGCGCTTGGGA  
GGCGGACATGCGCGCCGCTTACAGGGCTTCGAAGCCAAACGCGGCACTGCGCACCCAGATCA  
CAAGACGGGCGTGCAGCGGGGCGGATCGGGTATTTGAGATATGGAAGAGTATTCCAGAGGAA  
GCTTTGTTCTCCCAATATGATGAAGTGATTCGACAGGTCCAGGCGGAGAAAAGACGGGACTT  
TGGGTCCCATGATCTGTTCCGCAAGTTGGCGGAACCGAAGTATCAGCCCCTGTGGCGCGCCG  
ACGAGACCTTTTTGACGCGCTACGCCCTGTACAATGGAGTCTTGCGGGATTTAGAGAAAGCG  
AGACAGTTCGCCACGTTACGCTGCCGGATGCCTGCGTCAATCCAATTTGGACGCGTTTTGA  
AAGCAGCCAGGGGAGCAATCTGCATAAATATGAATTTCTCTTTGACCACCTGGGACCCGGAC  
GGCACGCGGTGCGTTTTTCAGAGGCTGCTGGTGGTAGAGAGCGAAGGTGCGAAGGAGAGGGAC  
TCGGTGGTGGTGCCAGTCGCGCCATCCGGGCAACTGGACAAGCTTGTCTGCGTGAAGAAGA  
GAAATCAAGCGTTGCCTTACACCTTCATGACACAGCCCGGCCGACGGTTTTCATGGCAGAAT  
GGGCGGGGGCGAAGCTGCAATATGAACGCAGTACCTTGGCACGCAAGGCGCGCCGTGATAAG  
CAAGGGATGCGGTGCTGGCGTAGGCAGCCGTCTATGCTGATGTCTGCGGCACAGATGTTGGA  
AGACGCAAAGCAAGCCGGAGACGTGTATCTGAACATCAGTGTGCGTGTGAAGAGCCCCAGTG  
AAGTCCGCGGCCAGAGGCGGCCTCCTTACGCGGCCCTGTTTCGGATAGACGATAAACAGCGG  
CGTGTGACCGTAAATTACAACAACTGTGCGGTTACCTAGAGGAACATCCGGATAAACAGAT  
TCCAGGCGCACCTGGGCTCCTTTCCGGTCTTCGGGTAATGAGCGTCGACCTTGGGTGCGCA  
CCTCCGCTTCCATCAGTGTGTTCCGTGTGGCAAAGAAGGAAGAGGTGGAAGCGCTGGGCGAC  
GGTGTCCCCCTCATTATTATCCATCCATGGCACTGACGACCTGGTGGCGGTGCACGAGCG  
CTCACATTTGATTCAAATGCCAGGCGAAACCGAAACGAAACAGCTGCGCAAGTTGCGTGAGG

AACGGCAGGCTGTCTTGCGTCCACTGTTTCGCTCAACTGGCCCTGCTACGGTTGCTGGTCCGG  
TGTGGTGCAGCCGACGAGCGGATTCGTACACGCAGTTGGCAGCGCTTGACGAAGCAGGGGCG  
TGAGTTTACGAAGCGATTGACGCCGTCTTGCGGGGAGGCGTTGGAATTGGAGTTAACTCGCT  
TGGAGGCGTATTGCGGTAGGGTTCCAGACGACGAATGGAGCCGCATCGTTGATAGAACGGTA  
ATCGCTTTGTGGCGTCGCATGGGAAAACAGGTGCGCGATTGGCGTAAACAGGTGAAATCCGG  
TGCGAAAGTCAAGGTCAAGGGGTACCAGCTGGATGTAGTCGGCGGCAACTCGCTGGCGCAA  
TCGATTATCTCGAACAGCAGTACAAGTTTCTGCGGGCGCTGGAGCTTCTTTGCGCGGGCCAGC  
GGTCTGGTTGTGCGGGCGGATCGCGAATCGCATTTCGCAGTCGCTTTACGCCAGCACATTGA  
AAATGCCAAGCGGGATCGGCTGAAAAAGTTGGCGGACCGCATCCTGATGGAGGCGCTGGGCT  
ACGTGTATGAAGCTTCCGGGCCGCGCGAAGGACAGTGGACGGCGCAGCATCCGCCGTGCCAG  
TTGATTATCTTGGAGGAATTAAGCGCGTACCGGTTTTCAGTGACGACCGTCCGCCGAGCGAGAA  
CAGTAAATTGATGGCTTGGGGGCATCGGGGAATTTTGGAGGAGTTGGTCAACCAAGCACAGG  
TTCACGACGTGTTAGTGGGGACGGTGTACGCCGCTTTTTTCGTCCCGCTTCGATGCCCCGACA  
GGCGCCCCTGGAGTGCCTGCCGCCGGGTACCCGCACGTTTTTGTGCGCGCGACGGTGGATGA  
TTCCTGCGGCTTTGGCTCACAGAGTTTCTGGACAAGCACAGGCTGGATAAAAACCTCCTGC  
GGCCTGACGATGTGATTCCGACCGGAGAGGGTGAGTTTTTGGTTTTCTCCGTGTGGCGAGGAA  
GCGGCTCGGGTTCGGCAGGTGCACGCCGACATCAACGCGGCGCAAACCTGCAGCGGAGGCT  
GTGGCAGAATTTTACATTACAGAGCTGCGTCTGCGCTGCGATGTGAAGATGGGTGGCGAAG  
GAACGGTGCTGGTACCAAGGGTCAACAACGCCCGCGCCAAACAACCTGTTTGGAAAGAAGGTG  
TTGGTTTTCGCAAGATGGCGTGACGTTCTTTGAACGCAGTCAAACAGGTGGGAAACCGCACAG  
CGAGAAGCAGACGGATTTGACCGACAAGGAAGTAACTAATTGCGGAGGCGGACGAGGCGC  
GCGCCAAGTCGGTCGTCTCTTTTCGCGATCCGTCCGGGCACATCGGCAAGGGCCACTGGATT  
CGCCAAAGGGAGTTTTTGGTCTGTTGGTGAAGCAAAGGATTGAATCGCACACGGCGGAAAGGAT  
ACGGGTTTCGCGGCGTCCGGTAGCTCGCTGGAT

### **Humanized AkCas12b coding sequence**

ATGGCCGTGAAGAGCATCAAGGTGAAGCTGCGCCTGAGCGAGTGCCCCGACATCCTGGCCGG  
CATGTGGCAGCTGCACCGCGCCACCAACGCCGGCGTGCGCTACTACACCGAGTGGGTGAGCC  
TGATGCGCCAGGAGATCCTGTACAGCCGCGGCCCGACGGCGGCCAGCAGTGCTACATGACC  
GCCGAGGACTGCCAGCGGAGCTGCTGCGCCGCTGCGCAACCGCCAGCTGCACAACGGCCG  
CCAGGACCAGCCGGCACCGACGCGGACCTGCTGGCCATCAGCCGCCGCTGTACGAGATCC  
TGGTGTGCAGAGCATCGGCAAGCGCGGCGACGCCAGCAGATCGCCAGCAGCTTCTGAGC  
CCCCTGGTGGACCCCAACAGCAAGGGCGGCGGCGAGGCCAAGAGCGGCCGCAAGCCCGC  
CTGGCAGAAGATGCGCGACCAGGGCGACCCCGCTGGGTGGCCGCCCGGAGAAAGTACGAGC  
AGCGCAAGGCCGTGGACCCAGCAAGGAGATCCTGAACAGCCTGGACGCCCTGGGCTGCGC  
CCCCTGTTTCGCCGTGTTTACCAGACCTACCGCAGCGGCGTGGACTGGAAGCCCTGGGCAA  
GAGCCAGGGCGTGCGCACCTGGGACCGCGACATGTTCCAGCAGGCCCTGGAGCGCCTGATGA  
GCTGGGAGAGCTGGAACCGCCGCGTGGGCGAGGAGTACGCCCGCCTGTTCCAGCAGAAGATG  
AAGTTCGAGCAGGAGCACTTCGCCGAGCAGAGCCACCTGGTGAAGCTGGCCCGCGCCCTGGA  
GGCCGACATGCGCGCCGCGAGCCAGGGCTTCGAGGCCAAGCGCGCACCGCCACCAGATCA  
CCCGCCCGCCCTGCGCGGCGCCGACCGCGTGTTCGAGATCTGGAAGAGCATCCCCGAGGAG  
GCCCTGTTACGCCAGTACGACGAGGTGATCCGCCAGGTGCAGGCCGAGAAGCGCCGCGACTT  
CGGCAGCCACGACCTGTTTCGCCAAGCTGGCCGAGCCCAAGTACCAGCCCTGTggcgcgccg  
ACGAGACCTTCTGACCCGCTACGCCCTGTACAACGGCGTGCTGCGCGACCTGGAGAAGGCC

CGCCAGTTCGCCACCTTCACCCTGCCCGACGCCTGCGTGAACCCCATCTGGACCCGCTTCGA  
GAGCAGCCAGGGCAGCAACCTGCACAAGTACGAGTTCCTGTTTCGACCACCTGGGCCCGGCC  
GCCACGCCGTGCGCTTCAGCGCCTGCTGGTGGTGGAGAGCGAGGGCGCCAAGGAGCGCGAC  
AGCGTGGTGGTGCCCGTGGCCCCAGCGCCAGCTGGACAAGCTGGTGTGCGCGAGGAGGA  
GAAGAGCAGCGTGGCCCTGCACCTGCACGACACCGCCCCGCCCCGACGGCTTCATGGCCGAGT  
GGGCCGGCGCCAAGCTGCAGTACGAGCGCAGCACCTGGCCCCGAAGGCCCGCCGCGACAAG  
CAGGGCATGCGCAGCTGGCGCCGCCAGCCAGCATGCTGATGAGCGCCGCCAGATGCTGGA  
GGACGCCAAGCAGGCCGGCGACGTGTACCTGAACATCAGCGTGCAGCGTGAAGAGCCCCAGCG  
AGGTGCGCGGCCAGCGCCGCCCCCTACGCCGCCCTGTTCCGCATCGACGACAAGCAGCGC  
CGCGTGACCGTAACTACAACAAGCTGAGCGCCTACCTGGAGGAGCACCCCGACAAGCAGAT  
CCCCGGCGCCCCGGCCTGCTGAGCGGCCTGCGCGTATGAGCGTGGACCTGGGCCTGCGCA  
CCAGCGCCAGCATCAGCGTGTTCGCGTGGCCAAGAAGGAGGAGGTGGAGGCCCTGGGCGAC  
GGCCGCCCCCCCCACTACTACCCCATCCACGGCACCGACGACCTGGTGGCCGTGCACGAGCG  
CAGCCACCTGATCCAGATGCCCGGCGAGACCGAGACCAAGCAGCTGCGCAAGCTGCGCGAGG  
AGCGCCAGGCCGTGCTGCGCCCCCTGTTTCGCCAGCTGGCCCTGCTGCGCCTGCTGGTGC  
TGGCGCGCCGCCGACGAGCGCATCCGCACCCGCAGCTGGCAGCGCCTGACCAAGCAGGGCCG  
CGAGTTCACCAAGCGCCTGACCCCCAGCTGGCGCGAGGCCCTGGAGCTGGAGCTGACCCGCC  
TGGaggcctACTGCGGCCGCGTGCCCGACGACGAGTGGAGCCGCATCGTGGACCGCACCGTG  
ATCGCCCTGTGGCGCCGCATGGGCAAGCAGGTGCGCGACTGGCGCAAGCAGGTGAAGAGCGG  
CGCAAGGTGAAGGTGAAGGGCTACCAGCTGGACGTGGTGGGCGGCAACAGCCTGGCCCAGA  
TCGACTACCTGGAGCAGCAGTACAAGTTCCTGCGCCGCTGGAGCTTCTTCGCCCGCGCCAGC  
GGCCTGGTGGTGCAGCGCCGACCGCGAGAGCCACTTCGCCGTGGCCCTGCGCCAGCACATCGA  
GAACGCCAAGCGCGACCGCCTGAAGAAGCTGGCCGACCGCATCCTGATGGAGGCCCTGGGCT  
ACGTGTACGAGGCCAGCGGCCCGCGAGGGCCAGTGGACCGCCAGCACCCCCCTGCCAG  
CTGATCATCCTGGAGGAGCTGAGCGCCTACCGCTTCAGCGACGACCGCCCCCCAGCGAGAA  
CAGCAAGCTGATGGCCTGGGGCCACCGCGGCATCCTGGAGGAGCTGGTGAACCAGGCCCAGG  
TGCACGACGTGCTGGTGGGCACCGTGTACGCCGCTTCAGCAGCCGCTTCGACGCCCGCACC  
GGCGCCCCGGCGTGCAGTGCAGCGCCGCTGGCCGCCGCTTCGTGGGCGCCACCGTGGACGA  
CAGCCTGCCCCGTGGCTGACCGAGTTCCTGGACAAGCACCGCCTGGACAAGAACCTGCTGC  
GCCCCGACGACGTGATCCCCACCGGCGAGGGCGAGTTCCTGGTGGAGCCCTGCGGCGAGGAG  
GCCGCCCGCGTGCAGCAGGTGCACGCCGACATCAACGCCCGCCAGAACCCTGCAGCGCCGCT  
GTGGCAGAACTTCGACATCACCGAGCTGCGCCTGCGCTGCGACGTGAAGATGGGCGGCGAGG  
GCACCGTGTGGTGGCCCCGCGTGAACAACGCCCGCGCCAAGCAGCTGTTTCGGCAAGAAGGTG  
CTGGTGGAGCCAGGACGGCGTGACCTTCTTCGAGCGCAGCCAGACCGGCGGCAAGCCCCACAG  
CGAGAAGCAGACCGACCTGACCGACAAGGAGCTGGAGCTGATCGCCGAGGCCGACGAGGCC  
GCGCCAAGAGCGTGGTGTGTTCCGCGACCCCAGCGGCCACATCGGCAAGGGCCACTGGATC  
CGCCAGCGGAGTTCGGAGCCTGGTGAAGCAGCGCATCGAGAGCCACACCGCCGAGCGCAT  
CCGCGTGCAGCGCGTGGGCAGCAGCCTGGAC

**AkCas12b protein sequence**

MAVKS IKVKLRLSECPDILAGMWQLHRATNAGVRYYTEWVSLMRQEILYSRGPDGGQQCYMT  
AEDCQRELLRRLNRQLHNQRQDQPGTDADLLAISRRLYEILVLQSIGKRGDAQQIASSFLS  
PLVDPNSKGGRGEAKSGRKPAWQKMRDQGDPRWVAAREKYEQRKAVDPSKEILNSLDALGLR  
PLFAVFTETYSRSGVDWKPLGKSQGVRTWDRDMFQALERLMSWESWNRRRVGEEYARLFQQKM

KFEQEHFAEQSHLVKRLARALEADMRAASQGF EAKRGTAHQITRRALRGADRVFEIWKSIPEE  
ALFSQYDEVIRQVQAEKRRDFGSHDLFAKLAEPKYQPLWRADETFLTRYALYNGVLRDLEKA  
RQFATFTLPDACVNPIWTRFESSQGSNLHKYEF LFDHLGPRHAVRFQRLLVVESEGAKERD  
SVVVPVAPSGQLDKLVLREEEKS SVALHLHDTARPDGFMAEWAGAKLQYERSTLARKARRDK  
QGMRSWRRQPSMLMSAAQMLEDAKQAGDVYLNISVRVKS PSEVRGQRRPPYAALFRIDDKQR  
RVTVNYNKL SAYLEEHDPKQIPGAPGLLSGLRVMSVDLGLRTSASISVFRVAKKEEVEALGD  
GRPPHYYP IHGTDDLVAVHERSHLIQMPGETETKQLRKLREERQAVLRPLFAQLALLRLLVR  
CGAADERIRTRSWQRLTKQGREFTKRLTPSWREALELELTRLEAYCGRVPDDEWSRIVDRTV  
IALWRRMGKQVRDRKQVKSGAKVKVKGYQLDVVGGNSLAQIDYLEQQYKFLRRWSFFARAS  
GLVVRADRESHFAVALRQH IENAKRDRLKKLADRILMEALGYVYEASGPREGQWTAQHPPCQ  
LIILEELSAYRFSDDRPPSENSKLMAWGHRGILEELVNQAQVHDVLVGTVYAAFSSRFDART  
GAPGVRCRRV PARFVGATVDDSLPLWLTEFLDKHRLDKNLLRPDDVIPTGEGEFLVSPCGEE  
AARVRQVHADINAAQNLQRR LWQNF DITELRLRCDVKMGEGTVLVPRVNNARAKQLFGKKV  
LVSQDGVTF FERSQTGGKPHSEKQTDLTDKELELIAEADEARAKSVVLF RDPSGHIGKGHWI  
RQREFWLSLVKQRIESH TAERIRVRGVGSSLD

**Cas12b coding sequence from *Alicyclobacillus macrosporangiidus* strain DSM 17980**

**(GeneBank ID: FPBV01000001.1)**

ATGAACGTGGCCGTGAAATCCATCAAGGTCAAGCTGATGTTGGGT CACCTCCCGGAAATCCG  
GGAAGGGCTGTGGCACCTGCACGAGGCAGTCAACTTGGGAGTTCGCTACTACACGGAATGGC  
TGGCCCTCCTGCGCCAGGGAAACCTGTACCGGCGAGGCAAGGATGGTGCGCAGGAGTGCTAC  
ATGACGGCGGAGCAGTGCCGGCAGGAGTTGCTCGTGCGGCTGCGGGATCGACAGAAGCGCAA  
TGGGCATACCGGGGACCCGGGCACGGACGAGGAGTTGCTTGGCGTCCAGGCGGCTGTATG  
AGCTGTTGGTGCCGCAGTCCGTGCGGAAAAAGGGGCAGGCGCAGATGCTGGCCAGCGGTTTC  
CTGAGTCCATTGGCGGATCCGAAGTCCGAGGGAGGAAAGGGCACGTCCAAGTCTGGGCGCAA  
GCCGGCGTGATGGGCATGAAGGAGGCCGGGATTCGCGTTGGGTGGAGGCGAAGGCCCGGT  
ACGAAGCCAATAAAGCGAAGGATCCGACGAAGCAGGTGATTGCGTCTCTCGAGATGTACGGC  
CTGAGGCCGTTGTTTCGACGTGTTACGGAGACGTACAAAACGATCCGCTGGATGCCGTTGGG  
CAAACATCAAGGCGTGCGCGCCTGGGATCGCGACATGTTCCAACAGTCCTTGGAACGCCTGA  
TGTCCTGGGAATCCTGGAACGAACGCGTGGGGCGGAGTTTGCCCGGTTGGTGGACCGGCGG  
GACAGGTTCCGGGAAAAGCACTTCACCGGGCAGGAGCACCTGGTTCGCGCTGGCGCAACGGCT  
GGAACAGGAGATGAAAGAAGCGTCCCGGGGTTGAGTCCAAATCCTCTCAGGCGCACCGGA  
TCACAAAGCGCGCGCTGCGGGGGCGGACGGCATCATCGATGACTGGTTGAAGCTGTCTGAA  
GGGGAACCGGTGGATCGATTGATGAGATCCTCCGGAAGCGTCAGGCCAGAAATCCTCGCAG  
GTTCCGATCCCATGATCTCTTCTTGAAGTTGGCGGAACCTGTCTTTCAGCCGCTGTGGCGGG  
AGGACCCAAGTTTCTTGTGCGCTGGGCGTCTATAACGAAGTGTGTAACAAACTCGAGGAC  
GCGAAGCAGTTCGCCACCTTTACGCTGCCAAGTCCGTGCTCGAACCCGGTGTGGGCCCGGTT  
CGAGAACGCGGAGGGTACGAACATCTTCAAATACGACTTCTCTTCGACCACTTCGAAAGG  
GACGACACGGAGTTCGGTTTCAGCGGATGATCGTGATGCGGGACGGCGTGCCGACCGAGGTG  
GAGGGGATTGTCGTGCCGATTGCACCCTCCGGCAGTTGGACGCGCTCGCCCCAACGACGC  
CGCGTCGCCGATTGACGTTTTCTGTCGGCGATCCCGCGGCCCGGGCGCATTTTCGCGGACAGT  
TCGGGGGTGCGAAGATCCAGTACCGTCGATCGGCGCTGGTACGCAAAGGACGGCGCGAAGAG  
AAGGCGTACCTTTGTGGATTCCGCTTGCCGTGCGAACGCCGACGGGGACGCCTGCCGACGA



CGCGGGCGAGGTGTTTTTGAACCTCAGCCTGCGCGTGGAGAGCCAGTCGGAGCAGGCAGGAC  
GTCGCAATCCTCCCTATGCGGCCGTGTTTACATTTCCGACCAAACCCGCCGCGTGATCGTG  
AGATATGGCGAAATTGAGCGGTATCTGGCGGAGCACCCGGACACCGGCATCCCGGGGTACAG  
GGGGCTCACGAGCGGCCTGCGTGTGATGAGCGTAGACCTGGGATTGCGGACGTCCGCCGCTA  
TCTCGGTGTTTCGCGTGGCGCACAGGGACGAGCTCACGCCGATGCGCATGGACGCCAGCCC  
TTCTTTTTTCCCCATTCATGGTATGGACCATCTCGTCGCCCTCCATGAGCGCTCCCACCTCAT  
CCGCCTGCCGGGTGAGACGGAGTCCAAGAAAGTTTCGCAGCATCCGGGAGCAGAGGCTGGATC  
GGTTGAACCGGCTGCGGTCCCAGATGGCGTCTTTGCGGCTACTCGTTTGAACCGGGTCCCTG  
GATGAGCAGAAACGGGATCGCAACTGGGAACGCCTTTCAGTCCTCCATGGAACGCGGCGGAGA  
GCGGATGCCATCCGATTGGTGGGACTTGTTCGAAGCACAGGTGAGGTATCTGGCTCAGCATC  
GGGATGCTTCCGGCGAGGCGTGGGGGCGGATGGTACAGGCGGCAGTCCGCACCTTATGGAGG  
CAACTGGCCAAGCAGGTGCGCGACTGGCGAAAAGAGGTCCGTCGGAATGCAGACAAGGTGAA  
GATCAGGGGAATTGCCCGGGACGTTCCAGGGGGCCATTCCCTTGCGCAGCTGGACTATCTCG  
AACGACAGTACCGGTTCTTTCGCGGAGTTGGAGCGCCTTCTCCGTGCAGGCCGGCCAGGTGGTC  
CGCGCCGAGCGGGATTCCCGCTTCGCGGTGGCGCTGCGGGAGCATATCGACAACGGCAAGAA  
GGATCGGTTGAAGAAATTGGCGGATCGGATCCTCATGGAAGCCTTGGGATACGTGTACGTCA  
CGGACGGCCGCCGCGCCGGACAGTGGCAGGCTGTGTATCCGCCTTGTGAGCTCGTGCTGTTG  
GAGGAGTTGAGCGAGTACCGGTTTCAGCAATGACCGCCCGAGCGAAAACAGTCAATTGAT  
GGTGTGGAGCCACCGCGGCGTGTGGAGGAGTTGATCCACCAGGCGCAGGTTACGACGTGC  
TGGTGGGCACCATTCGCGCGGCGTTCGTCGCCGGTTCGATGCTCGGACGGGCGCACCGGGC  
ATCCGGTGCAGGAGAGTGCCGTCGATCCCGCTGAAAGATGCCCGTCCATCCCCATTTGGCT  
GTCTCACTATCTCAAGCAAACGGAACGGGACGCTGCTGCTCTGCGGCCGGGCGAGCTCATCC  
CGACCGGTGACGGGGAGTTTCTGGTGACCCCCGCGGGCCGCGGGGCATCCGGTGTTCGCGTC  
GTCCATGCGGACATCAACGCGGCGCACAATCTGCAGAGGCGGTTGTGGGAGAACTTCGACCT  
CAGCGACATTCGGGTTCCGGTGTGACCGGCGTGAAGGGAAGGATGGCACGGTCGTCTCATCC  
CGAGGCTGACGAACCAGCGGTGAAGGAGAGGTACAGCGGGGTTCATCTTCACGTCCGAGGAC  
GGTGTGAGCTTTACAGTGGGAGACGCCAAAACCCGGCGCCGATCTTCGGCTTCGACGGGGA  
AGGTGACGACCTGTGCGACGAAGAGCAGGAGTTGCTCGCTGAGGCGGATGACGCGCGGAGA  
GGTCTGTGCTCCTGTTCCGTGACCCGCTGTTTTCGTCAATGGGGGGCGATGGACCGCGCAA  
CGGGCGTTTTTGGGGCATGGTCCACAACCGGATCGAAACCTTGTGGCCGAGCGGTTTTCTGT  
GTCGGGAGCGGCCGAAAAGGTGAGAGGA

### **Humanized AmCas12b coding sequence**

ATGAACGTGGCCGTGAAGAGCATCAAGGTGAAGCTGATGCTGGGCCACCTGCCCGAGATCCG  
CGAGGGCCTGTGGCACCTGCACGAGGCCGTGAACCTGGGCGTGCCTACTACACCGAGTGGC  
TGGCCCTGCTGCGCCAGGGCAACCTGTACCGCCGCGGCAAGGACGGCGCCCAGGAGTGCTAC  
ATGACCGCCGAGCAGTGCCGCCAGGAGCTGCTGGTGCCTGCGCGACCGCCAGAAGCGCAA  
CGGCCACACCGGCGACCCCGGCACCGACGAGGAGCTGCTGGGCGTGGCCCGCCGCTGTACG  
AGCTGCTGGTGGCCAGAGCGTGGGCAAGAAGGGCCAGGCCAGATGCTGGCCAGCGGCTTC  
CTGAGCCCCCTGGCCGACCCCAAGAGCGAGGGCGGCAAGGGCACCAGCAAGAGCGGCCGCAA  
GCCCGCCTGGATGGGCATGAAGGAGGCCGGCGACAGCCGCTGGGTGGAGGCCAAGGCCCGCT  
ACGAGGCCAACAAGGCCAAGGACCCCAAGCAGGTGATCGCCAGCCTGGAGATGTACGGC  
CTGCGCCCCCTGTTTCGACGTGTTACCGAGACCTACAAGACCATCCGCTGGATGCCCTGGG  
CAAGCACCAGGGCGTGCAGCCTGGGACCGCGACATGTTCCAGCAGAGCCTGGAGCGCCTGA

TGAGCTGGGAGAGCTGGAACGAGCGCGTGGGCGCCGAGTTCGCCCCGCTGGTGGACCGCCG  
GACCGCTTCCGCGAGAAGCACTTCACCGGCCAGGAGCACCTGGTGGCCCTGGCCCAGCGCCT  
GGAGCAGGAGATGAAGGAGGCCAGCCCCGGCTTCGAGAGCAAGAGCAGCCAGGCCACC  
TCACCAAGCGCGCCCTGCGCGGCCGACGGCATCATCGACGACTGGCTGAAGCTGAGCGAG  
GGCGAGCCCGTGGACCGCTTCGACGAGATCCTGCGCAAGCGCCAGGCCAGAACCCCCGCCG  
CTTCGGCAGCCACGACCTGTTCTGAAGCTGGCCGAGCCCGTGTTCAGCCCCCTGTGGCGCG  
AGGACCCCAGCTTCTGAGCCGCTGGGCCAGCTACAACGAGGTGCTGAACAAGCTGGAGGAC  
GCCAAGCAGTTTCGCCACCTTCACCCTGCCAGCCCCCTGCAGCAACCCCGTGTGGGCCCCGCTT  
CGAGAACGCCGAGGGCACCAACATCTTCAAGTACGACTTCTGTTCGACCACTTCGGCAAGG  
GCCGCCACGGCGTGCCTTCCAGCGCATGATCGTGATGCGCGACGGCGTGCCACCGAGGTG  
GAGGGCATCGTGGTGCCATCGCCCCAGCCGCCAGCTGGACGCCCTGGCCCCAACGACGC  
CGCCAGCCCCATCGACGTGTTCTGTGGGCGACCCCGCCGCCCGGGCGCCTTCCGCGGCCAGT  
TCGGCGGGCCAAAGATCCAGTACCGCCGACGCGCCCTGGTGCACAAGGGCCCGCGAGGAG  
AAGGCCTACCTGTGCGGCTTCCGCCTGCCAGCCAGCGCCGACCCGGCACCCCGCCGACGA  
CGCCGGCGAGGTGTTCTGAACCTGAGCCTGCGCGTGGAGAGCCAGAGCGAGCAGGCCGGCC  
GCCGCAACCCCCCTACGCCGCGTGTTCACATCAGCGACCAGACCCGCGCGTGATCGTG  
CGCTACGGCGAGATCGAGCGCTACCTGGCCGAGCACCCCGACACCCGGCATCCCCGGCAGCCG  
CGGCCTGACCAGCGGCCTGCGCGTGATGAGCGTGGACCTGGGCCTGCGCACCCAGCGCCGCCA  
TCAGCGTGTTCGCGTGGCCACCGCGACGAGCTGACCCCGACGCCACGGCCGCCAGCCC  
TTCTTCTTCCCCATCCACGGCATGGACCACCTGGTGGCCCTGCACGAGCGCAGCCACCTGAT  
CCGCCTGCCCGGCGAGACCCGAGAGCAAGAAGGTGCGCAGCATCCGCGAGCAGCGCCTGGACC  
GCCTGAACCGCCTGCGCAGCCAGATGGCCAGCCTGCGCCTGCTGGTGCACCCGGCGTGCTG  
GACGAGCAGAAGCGCGACCCGCAACTGGGAGCGCCTGCAGAGCAGCATGGAGCGCGGGCGGCGA  
GCGCATGCCAGCGACTGGTGGGACCTGTTCCAGGCCAGGTGCGCTACCTGGCCAGCACC  
GCGACGCCAGCGGCGAGGCCTGGGGCCGCATGGTGCAGGCCGCGTGCACACCCTGTGGCGC  
CAGCTGGCCAAGCAGGTGCGCGACTGGCGCAAGGAGGTGCGCCGCAACGCCGACAAGGTGAA  
GATCCGCGCATCGCCCCGCGACGTGCCCGGGCCACAGCCTGGCCAGCTGGACTACCTGG  
AGCGCCAGTACCGCTTCTGCGCAGCTGGAGCGCCTTCAGCGTGCAGGCCGGCCAGGTGGTG  
CGCGCCGAGCGCGACAGCCGCTTCGCCGTGGCCCTGCGCGAGCACATCGACAACGGCAAGAA  
GGACCGCCTGAAGAAGCTGGCCGACCGCATCCTGATGGAGGCCCTGGGCTACGTGTACGTGA  
CCGACGGCCGCCGCGCCGGCCAGTGGCAGGCCGTGTACCCCCCTGCCAGCTGGTGTGCTG  
GAGGAGCTGAGCGAGTACCGCTTCAGCAACGACCCGCCCCCAGCGAGAACAGCCAGCTGAT  
GGTGTGGAGCCACCGCGCGTGTGGAGGAGCTGATCCACCAGGCCAGGTGCACGACGTGC  
TGGTGGGCACCATCCCCGCGCCTTCAGCAGCCGCTTCGACGCCCCGACCCGGCGCCCCCGGC  
ATCCGCTGCCGCGCGTGCCAGCATCCCCCTGAAGGACGCCCCAGCATCCCCATCTGGCT  
GAGCCACTACCTGAAGCAGACCGAGCGCGACGCCGCCCTGCGCCCCGGCGAGCTGATCC  
CCACCGGCGACGGCGAGTTCTGGTGACCCCGCCGGCCGCGGCGCCAGCGGCGTGCAGCTG  
GTGCACGCCGACATCAACGCCGCCACAACCTGCAGCGCCGCCTGTGGGAGAACTTCGACCT  
GAGCGACATCCGCGTGCCTGCGACCCGCGGAGGGCAAGGACGGCACCGTGGTGCTGATCC  
CCCGCCTGACCAACCAGCGGTGAAGGAGCGCTACAGCGGCGTGATCTTCACCAGCGAGGAC  
GGCGTGAGCTTACCCTGGGCGACGCCAAGACCCGCCCGCAGCAGCGCCAGCCAGGGCGA  
GGCGACGACCTGAGCGACGAGGAGCAGGAGCTGCTGGCCGAGGCCGACGACGCCCGCGAGC  
GCAGCGTGGTGTGTTCCGCGACCCAGCGGCTTCGTGAACGGCGGGCCGTGGACCGCCAG  
CGCGCCTTCTGGGGCATGGTGCACAACCGCATCGAGACCCTGCTGGCCGAGCGCTTCAGCGT

GAGCGGCGCCGCCGAGAAGGTGCGCGGC

### **AmCas12b protein sequence**

MNVAVKSIKVKLMLGHLPEIREGLWHLHEAVNLGVRYYTEWLALLRQGNLYRRGKDGAQECY  
MTAEQCRQELLVRLRDRQKRNGHTGDPGTDEELLGVARRLYELLVPQSVGKKGQAQMLASGF  
LSPLADPKSEGGKGTSKSGRKPAAWGMKEAGDSRWVEAKARYEANKAKDPTKQVIASLEMYG  
LRPLFDVFTETETYKTIRWMP LGKHQGVRAWDRDMFQQSLERLMSWESWNERVGAEFARLVDRR  
DRFREKHFTGQEHVALAQRLEQEMKEASPGFESKSSQAHRITKRALRGADGIIDDWLKLESE  
GEPVDRFDEILRKRQAQNPRRFGSHDLFLKLAEPVFQPLWREDPSFLSRWASYNEVLNKLED  
AKQFATFTLPSPCSNPVWARFENAEGTNI FKYDFLFDHFGKGRHGVRFQRMIVMRDGVPTVEV  
EGIVVPIAPSRQLDALAPNDAASPIDVFGDPAAPGAFRGQFGGAKIQYRRSALVRKGRREE  
KAYLCGFRLPSQRRTGTPADDAGEVFLNLSLRVESQSEQAGRNPYPYAAVFHISDQTRRVIV  
RYGEIERYLAEHPDTGIPGSRGLTSGLRVMSVDLGLRTSAAISVFRVAHRDELTPDAHGRQP  
FFFPIHGMDHLVALHERSHLIRLPGETESKKVRSIREQLDRLNRLRSQMASLRLLVRTGVL  
DEQKRDRNWERLQSSMERGGERMPSDWDWDLFQAQVRYLAQHRDASGEAWGRMVQAAVRTLWR  
QLAKQVRDWRKEVRRNADKVKIRGIARDVPGHSLAQLDYLERQYRFLRSWSAFSVQAGQVV  
RAERDSRFAVALREHIDNGKKDRLKKLADRI LMEALGYVYVTDGRRAGQWQAVYPPCQLVLL  
EELSEYRFSNDRPPSENSQLMVWSHRGVLEELIHQAQVHDVLVGTIPAAFSSRFDARTGAPG  
IRCRRVPSIPLKDAPSIPIWLSHYLKQTERDAAALRPGELIPTGDGEFLVTPAGR GASVVRV  
VHADINAAHNLQRRLLWENFDLSDIRVRCDRREGKDGTVVLI PRLTNQRVKERYSGVIFTSED  
GVSFTVGDATR RRSSASQGEDDLSDDEEQELLA EADDARERSVVLFRDPSGFVNGGRWTAQ  
RAFWGMVHNRIETLLAERFSVSGAAEKVRG

### **Cas12b coding sequence from *Bacillus sp.* NSP2.1 (GeneBank ID: NZ\_KI301973.1)**

ATGGCAATCCGTAGCATAAACTAAAACAAAACCCACACAGGCCCGGAAGCGCAAAACCT  
CCGAAAAGGAATATGGCGGACGCATCGGTTGTTAAATGAAGGCGTCGCCTATTACATGAAAA  
TGCTCCTGCTCTTTCGTCAGGAAAGCACTGGTGAACGGCCAAAAGAAGAACTACAGGAAGAA  
CTGATTTGTACATACGCGAACAGCAACAACGAAATCAGGCAGATAAAAATACGCAAGCGCT  
TCCGCTAGATAAAGGCACTGGAAGCTTTGCGCCAACCTATATGAACTGCTTGTCCCCTCCTCGG  
TCGGACAAAGTGGCGACGCCAGATCATCAGCCGAAAGTTTCTCAGCCCGCTCGTCGATCCG  
AACAGCGAAGGCGGCAAAGGTACTTCAAGGCAGGGGCAAACCCACTTGGCAGAAGAAAAA  
AGAAGCGAACGACCAACCTGGGAACAGGATTACGAAAAATGGAAAAAAGACGCGAGGAAG  
ACCAACCGCTTCTGTGATTACTACTTTGGAGGAATACGGCATTAGACCGATCTTTCCCCTG  
TACACGAACACCGTAACAGATATCGCGTGGTTGCCACTTCAATCCAATCAGTTTGTGCGAAC  
CTGGGACAGAGACATGCTTCAACAAGCGATTGAAAGACTGCTCAGTTGGGAGAGCTGGAACA  
AACGTGTCCAGGAAGAGTATGCCAAGCTGAAAGAAAAAATGGCTCAACTGAACGAGCAACTC  
GAAGGCGGTCAGGAATGGATCAGCTTGCTAGAGCAGTACGAAGAAAACCGAGAGCGAGAGCT  
TAGGGAAAACATGACCGCTGCCAATGACAAGTATCGGATTACCAAGCGGCAAATGAAAGGCT  
GGAACGAGCTGTACGAGCTATGGTCAACCTTTCCC GCCAGTGCCAGTCACGAGCAATACAAA  
GAGGCGCTCAAGCGTGTGCAGCAGCGACTGAGAGGGCGGTTTGGGGATGCTCATTTCTTCCA  
GTATCTGATGGAAGAGAAGAACCGCCTGATCTGGAAGGGGAATCCGCAGCGTATCCATTATT  
TTGTGCGCGCAACGAACTGACGAAACGGCTGGAGGAAGCCAAGCAAAGCGCCACGATGACG  
TTGCCAATGCCAGGAAGCATCCATTGTGGGTGCGCTTCGATGCACGGGGAGGAAATTTGCA

AGACTACTACTTGACGGCTGAAGCGGACAAACCGAGAAGCAGACGTTTTGTAACTTTAGTC  
AGTTGATATGGCCAAGCGAATCGGGATGGATGGAAAAGAAAGACGTCGAGGTCGAGCTAGCT  
TTGTCCAGGCAGTTTTACCAGCAGGTGAAGTTGCTGAAAAATGACAAAGGCAAGCAGAAAAT  
CGAGTTCAAGGATAAAGGTTCCGGGCTCGACGTTTAAACGGACACTTGGGGGGAGCAAAGCTAC  
AACTGGAGCGGGGCGATTTGGAGAAGGAAGAAAAAACTTCGAGGACGGGGAAATCGGCAGC  
GTTTACCTTAACGTTGTCATTGATTTTCGAACCTTTGCAAGAAGTGAAAAATGGCCGCGTGCA  
GGCGCCGTATGGACAAGTACTGCAACTCATTCGTCGCCCAACGAGTTTCCCAAGGTCACTA  
CCTATAAGTCGGAGCAACTTGTGAATGGATAAAAGCTTCGCCACAACACTCGGCTGGGGTG  
GAGTCGCTGGCATCCGGTTTTTCGTGTAATGAGCATAGACCTTGGGCTGCGCGCGGCTGCAGC  
GACTTCTATTTTTTCTGTAGAAGAGAGTAGCGATAAAAAATGCGGCTGATTTTTCTACTGGA  
TTGAAGGAACGCCGCTGGTTCGCTGTCCATCAGCGGAGCTATATGCTCAGGTTGCCTGGTGAA  
CAGGTAGAAAAACAGGTGATGGAAAAACGGGACGAGCGGTTCCAGCTACACCAACGTGTGAA  
GTTTCAAATCAGAGTGCTCGCCAAATCATGCGTATGGCAAATAAGCAGTATGGAGATCGCT  
GGGATGAACTCGACAGCCTGAAACAAGCGGTTGAGCAGAAAAAGTCGCCGCTCGATCAAACA  
GACCGGACATTTTGGGAGGGGATTGTCTGCGACTTAACAAAGGTTTTGCCTCGAAACGAAGC  
GGACTGGGAACAAGCGGTAGTGCAAATACCCGAAAAGCAGAGGAATACGTCGGAAAAGCCG  
TTCAGGCATGGCGCAAGCGCTTTGCTGCTGACGAGCGAAAAGGCATCGCAGGTCTGAGCATG  
TGGAACATAGAAGAATTGGAGGGCTTGCGCAAGCTGTTGATTTCTGGAGCCGAGGACGAG  
GAATCCGCAGGAGGTTAATCGCTTTGAGCGAGGCCATAACCAGCCACCAGCGTCTGTTGACCC  
ATATCCAAAACGTCAAAGAGGATCGCCTGAAGCAGTTAAGTCACGCCATTTGTCATGACTGCC  
TTGGGGTATGTTTACGACGAGCGGAAACAAGAGTGGTGCGCCGAATACCCGGCTTGCCAGGT  
CATTTCTGTTTGAAAATCTGAGCCAGTACCGTTCTAACCTGGATCGCTCGACCAAAGAAAAT  
CCACCTTGATGAAGTGGGCGCATCGCAGCATTCGAAAATACGTCCACATGCAGGCGGAGCCA  
TACGGGATTCAGATTGGCGATGTCCGGGCGGAATATTCCTCTCGTTTTTACGCCAAGACAGG  
AACGCCAGGCATTCGTTGTAAAAAGGTGAGAGGCCAAGACCTGCAGGGCAGACGGTTTGAGA  
ACTTGCAGAAGAGGTTAGTCAACGAGCAATTTTTGACGGAAGAACAAGTGAAACAGCTAAGG  
CCCGGCACATTTGTCGGATGATAGCGGAGAAGTGTTCATGACCTTGACAGACGGAAGCGG  
AAGCAAGGAGGTCGTGTTTTCTCCAGGCCGATATTAACGCGGCGCACAATCTGCAAAAACGTT  
TTTGGCAGCGATAACAATGAACTGTTCAAGGTTAGCTGCCGCGTCATCGTCCGAGACGAGGAA  
GAGTATCTCGTTCCCAAGACAAAATCGGTGCAGGCAAAGCTGGGCAAAGGGCTTTTTGTGAA  
AAAATCGGATACAGCCTGGAAAGATGTATATGTGTGGGACAGCCAGGCAAAGCTTAAAGGTA  
AAACAACCTTTACAGAAGAGTCTGAGTCGCCGAACAACCTGGAAGACTTTCAGGAGATCATC  
GAGGAAGCAGAAGAGGCGAAAAGGAACATACCGTACACTGTTCCGCGATCCTAGCGGAGTCTT  
TTTTCCCGAATCCGTATGGTATCCCCAAAAGATTTTTGGGGCGAGGTGAAAAGGAAGCTGT  
ACGGAAAATTGCGGGAACGGTTTTTTGACAAAGGCTCGG

### **Humanized BsCas12b coding sequence**

ATGGCCATCCGCAGCATCAAGCTGAAGCTGAAGACCCACACCGGCCCGAGGCCAGAACCT  
GCGCAAGGGCATCTGGCGCACCCACCGCCTGCTGAACGAGGGCGTGGCCTACTACATGAAGA  
TGCTGCTGCTGTTCCGCCAGGAGAGCACCGGCGAGCGCCCAAGGAGGAGCTGCAGGAGGAG  
CTGATCTGCCACATCCGCGAGCAGCAGCGCAACCAGGCCGACAAGAACCCAGGCCCT  
GCCCTGGACAAGGCCCTGGAGGCCCTGCGCCAGCTGTACGAGCTGCTGGTGGCCAGCAGCG  
TGGGCCAGAGCGGCGACGCCAGATCATCAGCCGCAAGTTCCTGAGCCCCCTGGTGGACCCC  
AACAGCGAGGGCGGCAAGGGCACCCAGCAAGGCCGGCGCCAAGCCACCTGGCAGAAGAAGAA

GGAGGCCAACGACCCACCTGGGAGCAGGACTACGAGAAGTGAAGAAGCGCCGCGAGGAGG  
ACCCACCCGCCAGCGTGATCACCACCCTGGAGGAGTACGGCATCCGCCCCATCTTCCCCCTG  
TACACCAACACCGTGACCGACATCGCCTGGCTGCCCTGCAGAGCAACCAGTTCGTGCGCAC  
CTGGGACCGCGACATGCTGCAGCAGGCCATCGAGCGCCTGCTGAGCTGGGAGAGCTGGAACA  
AGCGCGTGCAGGAGGAGTACGCCAAGCTGAAGGAGAAGATGGCCCAGCTGAACGAGCAGCTG  
GAGGGCGGCCAGGAGTGGATCAGCCTGCTGGAGCAGTACGAGGAGAACC GCGAGCGCGAGCT  
GCGCGAGAACATGACCGCCGCAACGACAAGTACCGCATCACCAAGCGCCAGATGAAGGGCT  
GGAACGAGCTGTACGAGCTGTGGAGCACCTTCCCCGCCAGCGCCAGCCACGAGCAGTACAAG  
GAGGCCCTGAAGCGCGTGCAGCAGCGCTGCGCGGCCGCTTCGGCGACGCCACTTCTTCCA  
GTACCTGATGGAGGAGAAGAACC GCGCTGATCTGGAAGGGCAACCCCCAGCGCATCCACTACT  
TCGTGGCCCGCAACGAGCTGACCAAGCGCTGGAGGAGGCCAAGCAGAGCGCCACCATGACC  
CTGCCAACGCCC GCAAGCACCCCTGTGGGTGCGCTTCGACGCCCGCGGGCAACCTGCA  
GGACTACTACCTGACCGCCGAGGCCGACAAGCCCCGAGCCGCGCTTCGTGACCTTCAGCC  
AGCTGATCTGGCCAGCGAGAGCGGCTGGATGGAGAAGAAGGACGTGGAGGTGGAGCTGGCC  
CTGAGCCGCCAGTTCTACCAGCAGGTGAAGCTGCTGAAGAACGACAAGGGCAAGCAGAAGAT  
CGAGTTCAAGGACAAGGGCAGCGGCAGCACCTTCAACGGCCACCTGGGCGGCGCCAAGCTGC  
AGCTGGAGCGGGCGACCTGGAGAAGGAGGAGAAGAACTTCGAGGACGGCGAGATCGGCAGC  
GTGTACCTGAACGTGGTGATCGACTTCGAGCCCCTGCAGGAGGTGAAGAACGGCCGCGTGCA  
GGCCCCCTACGGCCAGGTGCTGCAGCTGATCCGCCGCCCAACGAGTTCCCAAGGTGACCA  
CCTACAAGAGCGAGCAGCTGGTGGAGTGGATCAAGGCCAGCCCCAGCACAGcgccggcgTG  
GAGAGCCTGGCCAGCGGCTTCCGCGTGATGAGCATCGACCTGGGCCTGCGCGCCGCCGCCG  
CACCAGCATCTTCAGCGTGGAGGAGAGCAGCGACAAGAACGCCGCCGACTTCAGCTACTGGA  
TCGAGGGCACCCCCCTGGTGGCCGTGCACCAGCGCAGCTACATGCTGCGCCTGCCCGGCGAG  
CAGGTGGAGAAGCAGGTGATGGAGAAGCGCGACGAGCGCTTCCAGCTGCACCAGCGCGTGAA  
GTTCCAGATCCGCGTGCTGGCCAGATCATGCGCATGGCCAACAAGCAGTACGGCGACCGCT  
GGGACGAGCTGGACAGCCTGAAGCAGGCCGTGGAGCAGAAGAAGAGCCCCCTGGACCAGACC  
GACCGCACCTTCTGGGAGGGC ATCGTGTGCGACCTGACCAAGGTGCTGCCCCGCAACGAGGC  
CGACTGGGAGCAGGCCGTGGTGCAGATCCACCGCAAGGCCGAGGAGTACGTGGGCAAGGCCG  
TGCAGGCCTGGCGCAAGCGCTTCGCCGCCGACGAGCGCAAGGGCATCGCCGGCCTGAGCATG  
TGAAACATCGAGGAGCTGGAGGGCCTGCGCAAGCTGCTGATCAGCTGGAGCCGCCGCACCCG  
CAACCCCCAGGAGGTGAACCGCTTCGAGCGCGGCCACACCAGCCACCAGCGCTGCTGACCC  
ACATCCAGAACGTGAAGGAGGACCGCCTGAAGCAGCTGAGCCACGCCATCGTGATGACCGCC  
CTGGGCTACGTGTACGACGAGCGCAAGCAGGAGTGGTGCGCCGAGTACCCCGCCTGCCAGGT  
GATCCTGTTGAGAACCTGAGCCAGTACCGCAGCAACCTGGACC GCGAGCACCAAGGAGAACA  
GCACCCTGATGAAGTGGGCCACCGCAGCATCCCCAAGTACGTGCACATGCAGGCCGAGCCC  
TACGGCATCCAGATCGGCGACGTGCGCGCCGAGTACAGCAGCCGCTTCTACGCCAAGACCGG  
CACCCCCGGCATCCGCTGCAAGAAGGTGCGCGGCCAGGACCTGCAGGGCCGCCGCTTCGAGA  
ACCTGCAGAAGCGCCTGGTGAACGAGCAGTTCCTGACCGAGGAGCAGGTGAAGCAGCTGCGC  
CCCGGCGACATCGTGCCCGACGACAGCGGCGAGCTGTTTATGACCCTGACCGACGGCAGCGG  
CAGCAAGGAGGTGGTGTTCCTGCAGGCCGACATCAACGCCGCCACAACCTGCAGAAGCGCT  
TCTGGCAGCGCTACAACGAGCTGTTCAAGGTGAGCTGCCGCGTGATCGTGCGGACGAGGAG  
GAGTACCTGGTGCCCAAGACCAAGAGCGTGCAGGCCAAGCTGGGCAAGGGCCTGTTCTGTGAA  
GAAGAGCGACACCGCCTGGAAGGACGTGTACGTGTGGGACAGCCAGGCCAAGCTGAAGGGCA  
AGACCACCTTCACCGAGGAGAGCGAGAGCCCCGAGCAGCTGGAGGACTTCCAGGAGATCATC

GAGGAGGCCGAGGAGGCCAAGGGCACCTACCGCACCTGTTCCGCGACCCCAGCGGCGTGT  
CTCCCCGAGAGCGTGTGGTACCCCCAGAAGGACTTCTGGGGCGAGGTGAAGCGCAAGCTGT  
ACGGCAAGCTGCGGAGCGCTTCTGACCAAGGCCCGC

### **BsCas12b protein sequence**

MAIRSIKLLKLTHTGPEAQNLKGIWRTHRLLEGVAYYMKMLLLFRQESTGERPKEELQEE  
LICHIREQQQRNQADKNTQALPLDKALEALRQLYELLVPSVSGDAQIIISRKFLSPLVDP  
NSEGGKGTSKAGAKPTWQKKKEANDPTWEQDYEKWKKRREEDPTASVITTTLEEYGIRPIFPL  
YTNTVTDIAWLPLQSNQFVRTWDRDMLQQAIERLLSWESWNKRVQEEYAKLKEKMAQLNEQL  
EGGQEWISLLEQYEENRERELRENMTAANDKYRITKRQMKGWNELYELWSTFPASASHEQYK  
EALKRVQQRRLRGRFGDAHFFQYLMEEKNRLIWKGNPQRIHYFVARNELTKRLEEAKQSATMT  
LPNARKHPLWVRFDARGGNLQDYLLTAEADKPRSRRFVTFSQLIWPSESGWMEKKDVEVELA  
LSRQFYQQVKLLKNDKKGKQKIEFKDKGSGSTFNGHLGGAKLQLERGDLEKEEKNFEDGEIGS  
VYLNVIDFEPLQEVKNGRVQAPYGVQLQIRRPNEFPKVTTYKSEQLVEWIKASPOHSAGV  
ESLASGFRVMSIDLGLRAAAATSIFSVEESSDKNAADFSYWIEGTPLVAVHQRSYMLRPLPGE  
QVEKQVMEKRDERFQLHQRVKFQIRVLAQIMRMANKQYGDRWDELDSLKQAVEQKKSPLDQT  
DRTFWEGIVCDLTKVLPNEADWEQAVVQIHRKAEYVVGKAVQAWRKRFAADERKGIAGLSM  
WNIEELEGLRKLII SWSRRTRNPQEVNRFERGHSTHQRLTHIQNVKEDRLKQLSHAIVMTA  
LGYVYDERKQEWCAEYPACQVILFENLSQYRSNLDKSTKENSTLMKWAHRSIPKYVHMQAEP  
YGIQIGDVRAEYSSRFYAKTGTGIRCKKVRGQDLQGRRFENLQKRLVNEQFLTEEQVKQLR  
PGDIVPDDSGELFMTLTDGSGSKEVVFLQADINAHNLQKRFWQRYNELFKVSCRVIVRDEE  
EYLVPKTKSVQAKLGKGLFVKKSDTAWKDVYVWDSQAKLKGKTTTFTEESESEPEQLEDFQEI  
EEAEEAKGTYRTLFRDPSGVFFPESVWYPQKDFWGEVKKRKYGLRERFLTKAR

### **pCAG-2AeGFP partial sequence**

(CAG-NLS-*XmaI*-*NheI*-NLS-T2A-eGFP-SV40)

gacattgattattgactagttattaatagtaaatcaattacggggtcattagttcatagccca  
tatatggagttccGCGTTACATAACTTACGGTAAATGGCCCGCCTGGCTGACCGCCCAACGA  
CCCCCGCCATTGACGTCAATAATGACGTATGTTCCCATAGTAACGCCAATAGGGACTTTCC  
ATTGACGTCAATGGGTGGACTATTTACGGTAAACTGCCACTTGGCAGTACATCAAGTGTAT  
CATATGCCAAGTACGCCCCCTATTGACGTCAATGACGGTAAATGGCCCGCCTGGCATTATGC  
CCAGTACATGACCTTATGGGACTTTCTACTTGGCAGTACATCTACGTATTAGTCATCGCTA  
TTACCATGGGTGAGGTGAGCCCCACGTTCTGCTTCACTCTCCCCATCTCCCCCCCCCTCCCC  
ACCCCAATTTTGTATTTATTTATTTTAAATTTTGTGCAGCGATGGGGGCGGGGGGGG  
GGGGGGCGCGCCAGGCGGGGCGGGGCGGGGCGAGGGGCGGGGCGGGGCGAGGCGGAGAGG  
TGCGGCGGCAGCCAATCAGAGCGGCGCGCTCCGAAAGTTTCCTTTTATGGCGAGGCGGCGGC  
GGCGGCGGCCCTATAAAAAGCGAAGCGCGCGGGCGGGGAGTCGCTGCGTTGCTTCGCC  
CGTGCCCCGCTCCGCGCCGCTCGCGCCGCCCGCCCCGGCTCTGACTGACCGCGTTACTCCC  
ACAGGTGAGCGGGCGGGACGGCCCTTCTCCTCCGGGCTGTAATTAGCGCTTGGTTTAAATGAC  
GGCTCGTTTTCTTTCTGTGGCTGCGTGAAAGCCTTAAAGGGCTCCGGGAGGGCCCTTTGTGC  
GGGGGGAGCGGCTCGGGGGTGCCTGCGTGTGTGTGTGCGTGGGGAGCGCCGCGTGC GGCC  
CGCGCTGCCCGGCGGCTGTGAGCGCTGCGGGCGCGGCGGGGCTTTGTGCGCTCCGCGTGT  
CGCGAGGGGAGCGCGGCCGGGGCGGTGCCCGCGGTGCGGGGGGCTGCGAGGGGAACAA

AGGCTGCGTGCGGGGTGTGTGCGTGGGGGGGTGAGCAGGGGGTGTGGGCGCGGCGGTTCGGGC  
TGTAACCCCCCTGCACCCCCTCCCCGAGTTGCTGAGCACGGCCCGGCTTCGGGTGCGGG  
GCTCCGTACGGGGCGTGGCGCGGGGCTCGCCGTGCCGGGCGGGGGGTGGCGGCAGGTGGGGG  
TGCCGGGCGGGGCGGGGCCCTCGGGCCGGGGAGGGCTCGGGGGAGGGGCGCGGCGGCCCC  
CGGAGCGCCGGCGGCTGTTCGAGGCGCGGCGAGCCGCAGCCATTGCCTTTTATGGTAATCGTG  
CGAGAGGGCGCAGGGACTTCCCTTGTCCCAAATCTGTGCGGAGCCGAAATCTGGGAGGCGCC  
GCCGCACCCCCTCTAGCGGGCGCGGGGCGAAGCGGTGCGGGCGCCGGCAGGAAGGAAATGGGC  
GGGAGGGCCTTCGTGCGTGCCTCGCCGCGCCCGCTCCCTTCTCCATCTCCAGCCTCGGGGCTG  
TCCGCAGGGGGACGGCTGCCTTCGGGGGGGACGGGGCAGGGCGGGGTTCGGCTTCTGGCGTG  
TGACCGGCGGCTCTAGcGCCTCTGCTAACCATGTTTCATGCCTTCTTCTTTTTTCTACAGctc  
ctgggcaacgtgctggttattgtgctgtctcatcattttggcaaaGCTAGTGAATTCTAATA  
CGACTACTATAGGCCGCCACCATG**CCCAAGAAGAAGAGGAAGGTT**cccggggctagc**CCAA**  
**AGAAGAAGAGGAAAGT**Ctctaga**TACCCTTATGATGTTCCAGATTATGCCGGATACCCATAC**  
**GATGTCCCTGACTATGCAGGCTCCTACCCTTATGACGTCCAGACTACGCC**ggatcc**AGGTC**  
**CGGCGGCGGAGAGGGCAGAGGAAGTCTTCTAACATGCGGTGACGTGGAGGAGAATCCCGGCC**  
**CAATGGTGAGCAAGGGCGAGGAGCTGTTACCGGGGTGGTGCCCATCTGGTTCGAGCTGGAC**  
**GGCGACGTAAACGGCCACAAGTTCAGCGTGTCCGGCGAGGGCGAGGGCGATGCCACCTACGG**  
**CAAGCTGACCCTGAAGTTCATCTGCACCACCGCAAGCTGCCCGTGCCCTGGCCCACCCTCG**  
**TGACCACCCTGACCTACGGCGTGCAGTGCTTCAGCCGCTACCCCGACCACATGAAGCAGCAC**  
**GACTTCTTCAAGTCCGCCATGCCGAAGGCTACGTCCAGGAGCGCACCATCTTCTTCAAGGA**  
**CGACGGCAACTACAAGACCCGCGCCGAGGTGAAGTTCGAGGGCGACACCCTGGTGAACCGCA**  
**TCGAGCTGAAGGGCATCGACTTCAAGGAGGACGGCAACATCCTGGGGCACAAGCTGGAGTAC**  
**AACTACAACAGCCACAACGTCTATATCATGGCCGACAAGCAGAAGAACGGCATCAAGGTGAA**  
**CTTCAAGATCCGCCACAACATCGAGGACGGCAGCGTGCAGCTCGCCGACACTACCAGCAGA**  
**ACACCCCATCGGCGACGGCCCCGTGCTGCTGCCCGACAACCACTACCTGAGCACCCAGTCC**  
**GCCCTGAGCAAAGACCCCAACGAGAAGCGCGATCACATGGTCTGCTGGAGTTCGTGACCGC**  
**CGCCGGGATCACTCTCGGCATGGACGAGCTGTACAAG**taactgcagcgcggggatctcatgc  
tgagttcttcgcccaccccaacttgttattgcagcttataatggttacaataaagcaat  
agcatcacaataatcacaataaagcatttttttactgcattctagttgtggtttgtccaa  
actcatcaatgtatctta

### **BPK2104-ccdB partial sequence**

**(*lacI-T7-lacO-NLS-XmaI-SpeI-His<sub>10</sub>-terminator*)**

TCACTGCCCGCTTTCAGTCGGGAAACCTGTCGTGCCAGCTGCATTAATGAATCGGCCAACG  
CGCGGGGAGAGGCGGTTTTCGTATTGGGCGCCAGGGTGGTTTTTCTTTTACCAGTGAGACG  
GGCAACAGCTGATTGCCCTTACCGCCTGGCCCTGAGAGAGTTGCAGCAAGCGGTCCACGCT  
GGTTTGCCCCAGCAGGCGAAAATCCTGTTTGATGGTGGTTAACGGCGGGATATAACATGAGC  
TGTCTTCGGTATCGTCGTATCCCACTACCGAGATGTCCGCACCAACCGCGCAGCCCGGACTCG  
GTAATGGCGCGCATTGCGCCCAGCGCCATCTGATCGTTGGCAACCAGCATCGCAGTGGGAAC  
GATGCCCTCATTACGATTTGCATGGTTTGTGAAAACCGGACATGGCACTCCAGTCGCCTT  
CCCGTTCGGCTATCGGCTGAATTTGATTGCGAGTGAGATATTTATGCCAGCCAGCCAGACGC  
AGACGCGCCGAGACAGAACTTAATGGGCCCGCTAACAGCGCGATTTGCTGGTGACCCAATGC  
GACCAGATGCTCCACGCCAGTCGCGTACCGTCTTCATGGGAGAAAATAATACTGTTGATGG  
GTGTCTGGTCAGAGACATCAAGAAATAACGCCGGAACATTAGTGCAGGCAGCTTCCACAGCA

ATGGCATCCTGGTCATCCAGCGGATAGTTAATGATCAGCCCACTGACGCGTTGCGCGAGAAG  
ATTGTGCACCGCCGCTTTACAGGCTTCGACGCCGCTTCGTTCTACCATCGACACCACCACGC  
TGGCACCCAGTTGATCGGCGCGAGATTTAATCGCCGCGACAATTTGCGACGGCGCGTGCAGG  
GCCAGACTGGAGGTGGCAACGCCAATCAGCAACGACTGTTTGCCCGCCAGTTGTTGTGCCAC  
GCGGTTGGGAATGTAATTCAGCTCCGCCATCGCCGCTTCCACTTTTTCCGCGTTTTTCGCAG  
AAACGTGGCTGGCCTGGTTCACCACGCGGGAAACGGTCTGATAAGAGACACCGGCATACTCT  
GCGACATCGTATAACGTTACTGTTTTACATTACCACCCTGAATTGACTCTCTTCCGGGCG  
CTATCATGCCATACCGCGAAAGTTTTGCGCCATTCGATGGTGTCCGGGATCTCGACGCTCT  
CCCTTATGCGACTCCTGCATTAGGAAATTAATACGACTCACTATAGGGGAATTGTGAGCGGA  
TAACAATTCCCTGTAGAAATAATTTGTTAACTTTAATAAGGAGATATCATATGCCAAG  
AAGAAGAGGAAGGTTcccggggctagtCATCACCATCACCACCATCATCACCATCACTAGGC  
GGCCGCATAATGCTTAAGTCGAACAGAAAGTAATCGTATTGTACACGGCCGCATAATCGAAA  
TTAATacgactcactataggGAATTCGGTACctgagaataactagcaTAACCCCTGGGGCC  
TCTAAACGGGTCTTGAGGGTTTTTTGCTGAAACCTCAGGCATTT

### pUC19-U6 partial sequence

(U6-BasI-HindIII)

TGTAAAACGACGGCCAGTGAATTCGAGGGCCTATTTCCCATGATTCCCTTCATATTTGCATAT  
ACGATACAAGGCTGTTAGAGAGATAAATTGGAATTAATTTGACTGTAAACACAAAGATATTAG  
TACAAAATACGTGACGTAGAAAGTAATAATTTCTTGGGTAGTTTGCAGTTTTAAAATTATGT  
TTTAAAATGGACTATCATATGCTTACCGTAACTTGAAAGTATTTGATTTCTTGGCTTTATA  
TATCTTGTGGAAAGGACGAAACACCGGAGAGACCNNNNNNNNGGTCTCANNNNNNNNNNNNNN  
NNNNNNNNNNNNNNNNNNNNNNNNNNNNNNNNNNNNNNNNNNNNNNNNNNNNNNNNNNNN  
NNNAGCTTGGCGTAATCATGGTCATAGCTGTTTCCTG

### pUC19-U6-Aa\_tracrRNA-tRNA-crRNA partial sequence

(U6-Aa\_tracrRNA-tRNA-crRNA\_scaffold-BasI-BasI-terminator)

TGTAAAACGACGGCCAGTGAATTCGAGGGCCTATTTCCCATGATTCCCTTCATATTTGCATAT  
ACGATACAAGGCTGTTAGAGAGATAAATTGGAATTAATTTGACTGTAAACACAAAGATATTAG  
TACAAAATACGTGACGTAGAAAGTAATAATTTCTTGGGTAGTTTGCAGTTTTAAAATTATGT  
TTTAAAATGGACTATCATATGCTTACCGTAACTTGAAAGTATTTGATTTCTTGGCTTTATA  
TATCTTGTGGAAAGGACGAAACACCGGTTCTAAAGGACAGAATTTTTCAACGGGTGTGCCAA  
TGGCCACTTTCCAGGTGGCAAAGCCCGTTGAACTTCTCAAAAAGAACGCTCGCTCAGTGTTT  
TGACAACAAAGCACCAGTGGTCTAGTGGTGAATAGTACCCTGCCACGGTACAGACCCGGGT  
TCGATTTCCCGCTGGTGCACTCGGATCACTGAGCGAGCGATCTGAGAAGTGGCACAGAGACC  
GAGAGAGGGTCTCAttttttttAAGCTTGGCGTAATCATGGTCATAGCTGTTTCCTG

### pUC19-U6-Ak\_tracrRNA-tRNA-crRNA partial sequence

(U6-Ak\_tracrRNA-tRNA-crRNA\_scaffold-BasI-BasI-terminator)

TGTAAAACGACGGCCAGTGAATTCGAGGGCCTATTTCCCATGATTCCCTTCATATTTGCATAT  
ACGATACAAGGCTGTTAGAGAGATAAATTGGAATTAATTTGACTGTAAACACAAAGATATTAG  
TACAAAATACGTGACGTAGAAAGTAATAATTTCTTGGGTAGTTTGCAGTTTTAAAATTATGT  
TTTAAAATGGACTATCATATGCTTACCGTAACTTGAAAGTATTTGATTTCTTGGCTTTATA



TATCTTGTGGAAAGGACGAAACACCGGTCGTCTATAGGACGGCGAGGACAACGGGAAGTGC  
CAATGTGCTCTTTCCAAGAGCAAACACCCCGTTGGCTTCAAGATGACCGCTCGCTCAGCGAT  
CTGACAACAAAGCACCAGTGGTCTAGTGGTGAATAGTACCCTGCCACGGTACAGACCCGGG  
TTCGATTCCCGCTGGTGC AACCGATCGCTGAGCGAGCGGTCTGAGAAGTGGCACAGAGAC  
CGAGAGAGGGTCTCAttttttttAAGCTTGGCGTAATCATGGTCATAGCTGTTTCCTG

#### **pUC19-U6-Am\_tracrRNA-tRNA-crRNA partial sequence**

(U6-Am\_tracrRNA-tRNA-crRNA\_scaffold-BasI-BasI-terminator)

TGTAAAACGACGGCCAGTGAATTCGAGGGCCTATTTCCCATGATTCCCTTCATATTTGCATAT  
ACGATACAAGGCTGTTAGAGAGATAAATTGGAATTAATTTGACTGTAAACACAAAGATATTAG  
TACAAAATACGTGACGTAGAAAGTAATAATTTCTTGGGTAGTTTGCAGTTTTAAAATTATGT  
TTTAAAATGGACTATCATATGCTTACCGTAACTTGAAAGTATTTTCGATTTCTTGGCTTTATA  
TATCTTGTGGAAAGGACGAAACACCGGGGAATTGCCGATCTATAGGACGGCAGATTCAACGG  
GATGTGCCAATGCACTCTTTCCAGGAGTGAACACCCCGTTGGCTTCAACATGATCGCCCGCT  
CAACGGTCCGATAACAAAGCACCAGTGGTCTAGTGGTGAATAGTACCCTGCCACGGTACAG  
ACCCGGTTTCGATTCCCGCTGGTGCAGTCGGATCACTGAGCGAGCGATCTGAGAAGTGGCA  
CAGAGACCAGAGAGGGTCTCAttttttttAAGCTTGGCGTAATCATGGTCATAGCTGTTTC  
CTG

#### **pUC19-U6-Bs\_tracrRNA-tRNA-crRNA partial sequence**

(U6-Bs\_tracrRNA-tRNA-crRNA\_scaffold-BasI-BasI-terminator)

TGTAAAACGACGGCCAGTGAATTCGAGGGCCTATTTCCCATGATTCCCTTCATATTTGCATAT  
ACGATACAAGGCTGTTAGAGAGATAAATTGGAATTAATTTGACTGTAAACACAAAGATATTAG  
TACAAAATACGTGACGTAGAAAGTAATAATTTCTTGGGTAGTTTGCAGTTTTAAAATTATGT  
TTTAAAATGGACTATCATATGCTTACCGTAACTTGAAAGTATTTTCGATTTCTTGGCTTTATA  
TATCTTGTGGAAAGGACGAAACACCGGCCATAAGTCGACTTACATATCCGTGCGTGTGCATT  
ATGGGCCCATCCACAGGTCTATTCCCACGGATAATCACGACTTTCCTACTAAGCTTTCGAATA  
ACAAAGCACCAGTGGTCTAGTGGTGAATAGTACCCTGCCACGGTACAGACCCGGTTTCGAT  
TCCCGGCTGGTGCAGTTCGAAAGCTTAGTGAAAGCTTCGTGGTTAGCACAGAGACCAGAGAG  
AGGGTCTCAttttttttAAGCTTGGCGTAATCATGGTCATAGCTGTTTCCTG

#### **pUC19-U6-AasgRNA partial sequence**

(U6-AasgRNA\_scaffold-BasI-BasI-terminator)

TGTAAAACGACGGCCAGTGAATTCGAGGGCCTATTTCCCATGATTCCCTTCATATTTGCATAT  
ACGATACAAGGCTGTTAGAGAGATAAATTGGAATTAATTTGACTGTAAACACAAAGATATTAG  
TACAAAATACGTGACGTAGAAAGTAATAATTTCTTGGGTAGTTTGCAGTTTTAAAATTATGT  
TTTAAAATGGACTATCATATGCTTACCGTAACTTGAAAGTATTTTCGATTTCTTGGCTTTATA  
TATCTTGTGGAAAGGACGAAACACCGGGTCTAAAGGACAGAATTTTTCAACGGGTGTGCCAA  
TGGCCACTTTCAGGTGGCAAAGCCCGTTGAACTTCTCAAAAAGAACGCTCGCTCAGTGTTTC  
TGACGTCGGATCACTGAGCGAGCGATCTGAGAAGTGGCACAGAGACCAGAGAGGGTCTCAt  
tttttttAAGCTTGGCGTAATCATGGTCATAGCTGTTTCCTG

#### **pUC19-U6-AksgRNA partial sequence**

**(U6-AksgRNA\_scaffold-BasI-BasI-terminator)**

TGTA AACGACG GCCAGTGAATTCGAGGGCCTATTTCCCATGATTCCTTCATATTTGCATAT  
ACGATACAAGGCTGTTAGAGAGATAAATTGGAATTAATTTGACTGTAAACACAAAGATATTAG  
TACAAAATACGTGACGTAGAAAGTAATAATTTCTTGGGTAGTTTGCAGTTTTAAAATTATGT  
TTTAAAATGGACTATCATATGCTTACCGTAACCTGAAAGTATTTTCGATTTCTTGGCTTTATA  
TATCTTGTGGAAAGGACGAAACACCGGt cgtctataGGACGGCGAGGACAACGGGAAGTGCC  
AATGTGCTCTTTCCAAGAGCAAACACCCCGTTGGCTTCAAGATGACCGCTCGCTCAGCGATC  
TGACAACGGATCGCTGAGCGAGCGGTCTGAGAAGTGGCACAGAGACCGAGAGAGGGTCTCAt  
tttttttAAGCTTGGCGTAATCATGGTCATAGCTGTTTCCTG

**pUC19-U6-AmsgRNA partial sequence**

**(U6-AmsgRNA\_scaffold-BasI-BasI-terminator)**

TGTA AACGACG GCCAGTGAATTCGAGGGCCTATTTCCCATGATTCCTTCATATTTGCATAT  
ACGATACAAGGCTGTTAGAGAGATAAATTGGAATTAATTTGACTGTAAACACAAAGATATTAG  
TACAAAATACGTGACGTAGAAAGTAATAATTTCTTGGGTAGTTTGCAGTTTTAAAATTATGT  
TTTAAAATGGACTATCATATGCTTACCGTAACCTGAAAGTATTTTCGATTTCTTGGCTTTATA  
TATCTTGTGGAAAGGACGAAACACCGGggaattgccgatctaTAGGACGGCAGATTCAACGG  
GATGTGCCAATGCACTCTTTCCAGGAGTGAACACCCCGTTGGCTTCAACATGATCGCCCGCT  
CAACGGTCCGATGTCGGATCGTTGAGCGGGCGATCTGAGAAGTGGCACAGAGACCGAGAGAG  
GGTCTCAttttttttAAGCTTGGCGTAATCATGGTCATAGCTGTTTCCTG

**pUC19-U6-BssgRNA partial sequence**

**(U6-BssgRNA\_scaffold-BasI-BasI-terminator)**

TGTA AACGACG GCCAGTGAATTCGAGGGCCTATTTCCCATGATTCCTTCATATTTGCATAT  
ACGATACAAGGCTGTTAGAGAGATAAATTGGAATTAATTTGACTGTAAACACAAAGATATTAG  
TACAAAATACGTGACGTAGAAAGTAATAATTTCTTGGGTAGTTTGCAGTTTTAAAATTATGT  
TTTAAAATGGACTATCATATGCTTACCGTAACCTGAAAGTATTTTCGATTTCTTGGCTTTATA  
TATCTTGTGGAAAGGACGAAACACCGGCCATAAGTCGACTTACATATCCGTGCGTGTGCATT  
ATGGGCCCATCCACAGGTCTATTCCCACGGATAATCACGACTTTCCACTAAGCTTTCGAATG  
TTCGAAAGCTTAGTGAAAGCTTCGTGGTTAGCACAGAGACCGAGAGAGGGTCTCAtttttt  
ttAAGCTTGGCGTAATCATGGTCATAGCTGTTTCCTG
